# Supplementary material for: Climate shapes mammal community trophic structures and humans simplify them
Source: PubMed Central journal article supplement (PMC6858300; doi:10.1038/s41467-019-12995-9), 2019-11-15
Supplement: 41467_2019_12995_MOESM3_ESM.pdf [file 41467_2019_12995_MOESM3_ESM.pdf]

## **Description of Additional Supplementary Files**

File Name: Supplementary Data 1

Description: Supplementary References

File Name: Supplementary Data 2

Description: Estimates of feeding preferences of large mammals based on analysis of supplementary references
