# Supplementary material for: Climate shapes mammal community trophic structures and humans simplify them
Source: PubMed Central journal article supplement (PMC6858300; doi:10.1038/s41467-019-12995-9), 2019-11-15
Supplement: 41467_2019_12995_MOESM4_ESM.pdf [file 41467_2019_12995_MOESM4_ESM.pdf]

**Supplementary Data File 1: References from which the feeding habits of the large mammals were obtained**

1. Aranda, M., & Sánchez-Cordero, V. (1996). Prey spectra of jaguar (*Panthera onca*) and puma (*Puma concolor*) in tropical forests of Mexico. *Studies on Neotropical Fauna and Environment*, 31(2), 65-67.
2. Asquith, N., J. Terbogh, A. Arnold, C. Riveros. 1999. The fruits the agouti ate: *Hymenaea courbaril* seed fate when its disperser is absent.. *Journal of Tropical Ecology*, 15: 229-235.
3. Atkinson, R. P. D., Macdonald, D. W., & Kamizola, R. (2002). Dietary opportunism in side-striped jackals *Canis adustus* Sundevall. *Journal of Zoology*, 257(1), 129-139.
4. Austin, D., P. Urness, 1995 *Wild Ungulate Depredation on Winter Wheat: Effects on Wheat Yield*. (On-line). Accessed December 10, 2013 at <http://digitalcommons.unl.edu/cgi/viewcontent.cgi?article=1421&context=gpwdcwp>.
5. Bagchi, S., Goyal, S. P., & Sankar, K. (2003). Prey abundance and prey selection by tigers (*Panthera tigris*) in a semi-arid, dry deciduous forest in western India. *Journal of Zoology*, 260(3), 285-290.
6. Barreto, G. R., Hernandez, O. E., & Ojasti, J. (1997). Diet of peccaries (*Tayassu tajacu* and *T. pecari*) in a dry forest of Venezuela. *Journal of Zoology*, 241(2), 279-284.
7. Beck-King, H., O. von Helversen, R. Beck-King. 1999. Home Range, Population Density, and Food Resources of *Agouti paca* (Rodentia: Agoutidae) in Costa Rica: A Study Using Alternative Methods. *Biotropica*, 31/4: 675-685.
8. Benefit, B. R. (2000). Old World monkey origins and diversification: an evolutionary study of diet and dentition. *Old World Monkeys*, 133.
9. Bhat, S.D., and Rawat, G.S. (1999). Some food plants of chital (*Axis axis*) in Rajaji National Park, India. *Journal of the Bombay Natural History Society* 96(3): 467-468.
10. Bhowmik, M.K., Chakraborty, T., and Raha, A.K. (1999). The habitat and food habits of hog deer (*Axis porcinus*) in protected areas of sub-Himalayan West Bengal. *Tiger Paper* 26(2): 25-27.
11. Bisbal E, F. J. (1986). Food habits of some neotropical carnivores in Venezuela (Mammalia, Carnivora). *Mammalia*, 50(3), 329-339.
12. Bruno, E., & Riccardi, C. (1995). The diet of the Crested porcupine *Hystrix cristata* L., 1758 in a Mediterranean rural area. *Zeitschrift für Säugetierkunde*, 60(4), 226-236.
13. Call, J. 2004. Inferences about the location of food in the Great Apes (*Pan paniscus*, *Pan troglodytes*, *Gorilla gorilla*, and *Pongo pygmaeus*). *Journal of Comparative Psychology*, 118: 232-241. Accessed August 15, 2013 at <http://www.cs.arizona.edu/projects/wonac/papers/Call2004JCP.pdf>.
14. Canadian Museum of Nature, 2003. "African Wild Dog" (On-line). Natural History Notebooks. Accessed 05/24/13 at <http://nature.ca/notebooks/english/afwildog.htm>
15. Capitani, C., Bertelli, I., Varuzza, P., Scandura, M., & Apollonio, M. (2004). A comparative analysis of wolf (*Canis lupus*) diet in three different Italian ecosystems. *Mammalian Biology-Zeitschrift für Säugetierkunde*, 69(1), 1-10.
16. Carbyn, L., T. Trotter. 1988. Descriptions of Wolf Attacks on Bison Calves in Wood Buffalo National Park. *Arctic*, 41: 297-302.
17. Carter, T., U. Mochi. 1971. *Hoofed Mammals of the World*. New York: Charles Scribner's Sons.
18. Cavallini, P., & Volpi, T. (1996). Variation in the diet of the red fox in a Mediterranean area. *Revue d'écologie*, 51(2), 173-189.
19. Cerling, T. E., Harris, J. M., & Passey, B. H. (2003). Diets of East African Bovidae based on stable isotope analysis. *Journal of Mammalogy*, 84(2), 456-470.

20. Cerling, T.E., and Viehl, K. (2004). Seasonal diet changes of the forest hog (*Hylochoerus meinertzhageni* Thomas) based on the carbon isotopic composition of hair. *African Journal of Ecology* **42**(2): 88-92.
21. Chapman, C. A., Chapman, L. J., & Gillespie, T. R. (2002). Scale issues in the study of primate foraging: red colobus of Kibale National Park. *American Journal of Physical Anthropology*, *117*(4), 349-363.
22. Chapple, R.S. (1989). *The biology and behaviour of chital deer (Axis axis) in captivity*. PhD Thesis, University of Sydney, NSW, Australia.
23. Chemes, S. B., Giraud, A. R., & Gil, G. (2010). Dieta de *Lontra Longicaudis* (Carnivora, Mustelidae) en el Parque Nacional El Rey (Salta, Argentina) y su comparación con otras poblaciones de la cuenca del Paraná. *Mastozoología neotropical*, *17*(1), 19-29.
24. Chiarello, A. G. (1998). Diet of the Atlantic forest maned sloth *Bradypus torquatus* (Xenarthra: Bradypodidae). *Journal of Zoology*, *246*(1), 11-19.
25. Chillo, V., D. Rodriguez, R. Ojeda. 2010. Niche partitioning and coexistence between two mammalian herbivores in the Dry Chaco of Argentina. *Acta Oecologica*, *36*/6: 611-616.
26. Clevenger, A. P., Purroy, F. J., & Pelton, M. R. (1992). Food habits on brown bears (*Ursus arctos*) in the Cantabrian Mountain, Spain. *Journal of Mammalogy*, *73*(2), 415-421.
27. Copley, P. B., & Robinson, A. C. (1983). Studies on the Yellow-Footed Rock-Wallaby, *Petrogale Xanthopus* Gray (Marsupialia: Macropodidae). 2. Diet. *Wildlife Research*, *10*(1), 63-76.
28. Codron, D., Codron, J., Lee-Thorp, J. A., Sponheimer, M., De Ruiter, D., Sealy, J., & Fourie, N. (2007). Diets of savanna ungulates from stable carbon isotope composition of faeces. *Journal of Zoology*, *273*(1), 21-29.
29. Coombes, K. E. (2005). *The ecology and utilisation of Lumholtz's tree kangaroos Dendrolagus lumholtzi (Marsupialia: Macropodidae), on the Atherton Tablelands, far north Queensland* (Doctoral dissertation, James Cook University).
30. Cristóbal-Azkarate, J., & Arroyo-Rodríguez, V. (2007). Diet and activity pattern of howler monkeys (*Alouatta palliata*) in Los Tuxtlas, Mexico: effects of habitat fragmentation and implications for conservation. *American Journal of Primatology*, *69*(9), 1013-1029.
31. Dasilva, G. L. (1994). Diet of Colobus polykomos on Tiwai Island: Selection of food in relation to its seasonal abundance and nutritional quality. *International Journal of Primatology*, *15*(5), 655-680.
32. de Garine-Wichatitsky, M., Duncan, P., Labbe, A., Suprin, B., Chardonnet, P., & Maillard, D. (2003). A review of the diet of Rusa Deer *Cervus timorensis russa* in New Caledonia: Are the endemic plants defenceless against this introduced, eruptive ruminant?. *Pacific Conservation Biology*, *9*(2), 136.
33. de Garine-Wichatitsky, M., Soubeyran, Y., Maillard, D., & Duncan, P. (2005). The diets of introduced rusa deer (*Cervus timorensis russa*) in a native sclerophyll forest and a native rainforest of New Caledonia. *New Zealand Journal of Zoology*, *32*(2), 117-126.
34. Delany, M., D. Happold. 1979. *Ecology of African Mammals*. New York: Longman Group Limited.
35. Dhungel, S.K., and O'Gara, B.W. (1991). The ecology of the hog deer in Royal Chitwan National Park, Nepal. *Wildlife Monographs* (119): 1-40.
36. Diller, H., T. Haltenorth. 1980. *The Collins Field Guide to the Mammals of Africa including Madagascar*. Lexington, Massachusetts: The Stephen Greene Press.
37. Dirks, W. (2003). Effect of diet on dental development in four species of catarrhine primates. *American Journal of Primatology*, *61*(1), 29-40.
38. Donadio, E., & Buskirk, S. W. (2006). Diet, morphology, and interspecific killing in Carnivora. *The American Naturalist*, *167*(4), 524-536.

39. Dorst, J. 1969. *A Field Guide to The Larger Mammals of Africa*. Great Britain: Houghton Mifflin Company Boston.
40. Downer, C. C. (2001). Observations on the diet and habitat of the mountain tapir (*Tapirus pinchaque*). *Journal of Zoology*, 254(3), 279-291.
41. Dubost, G. 1984. Comparison of the diets of frugivorous forest mammals of Gabon. *Journal of Mammalogy*; 65(2): 298-316.
42. Dunston, N., M. Gorman. 1998. *Behavior and Ecology of Riparian Mammals*. Cambridge: Cambridge University Press.
43. Edwards, G. P., Dawson, T. J., & Croft, D. B. (1995). The dietary overlap between red kangaroos (*Macropus rufus*) and sheep (*Ovis aries*) in the arid rangelands of Australia. *Australian journal of ecology*, 20(2), 324-334.
44. Eisenberg, J. F., and K. H. Redford. *Mammals of the Neotropics*. Chicago: The University of Chicago Press, 1999.
45. Elder, A. A. (2009). Hylobatid diets revisited: The importance of body mass, fruit availability, and interspecific competition. In *The Gibbons* (pp. 133-159). Springer New York.
46. Elliott, H.W. III, and Barrett, R.H. (1986). Dietary overlap among axis *Axis axis axis*, fallow *Dama dama dama*, and black-tailed deer *Odocoileus hemionus columbianus*, and cattle *Bos taurus*. *Journal of Range Management* 38(6): 546-550.
47. Ellis, B. A., Dawson, T. J., & Tierney, P. J. (1992). The diet of the bridled nailtail wallaby (*Onychogalea fraenata*), 1. Site and seasonal influences and dietary overlap with the black-striped wallaby (*Macropus dorsalis*) and domestic cattle [central Queensland]. *Wildlife Research*, 19.
48. Eltringham, S. 1979. *The Ecology and Conservation of Large African Mammals*. New York: The Macmillan Press Limited.
49. Emmons, L. H. (1987). Comparative feeding ecology of felids in a neotropical rainforest. *Behavioral Ecology and Sociobiology*, 20(4), 271-283.
50. Engqvist, A., & Richard, A. (1991). Diet as a possible determinant of cathemeral activity patterns in primates. *Folia Primatologica*, 57(3), 169-172.
51. Estes, R. 1991. *The Behavior Guide to African Mammals*. Los Angeles: The University of California Press.
52. Estrada, A., & Coates-Estrada, R. (1984). Fruit eating and seed dispersal by howling monkeys (*Alouatta palliata*) in the tropical rain forest of Los Tuxtlas, Mexico. *American Journal of Primatology*, 6(2), 77-91.
53. Everitt, J. H., Gonzalez, C. L., Alaniz, M. A., & Latigo, G. V. (1981). Food habits of the collared peccary on south Texas rangelands. *Journal of Range Management*, 141-144.
54. Farrell, L. E., Roman, J., & Sunquist, M. E. (2000). Dietary separation of sympatric carnivores identified by molecular analysis of scats. *Molecular Ecology*, 9(10), 1583-1590.
55. Feer, F. (1989). Comparaison des régimes alimentaires de *Cephalophus callipygus* et *C. dorsalis*, Bovidés sympatriques de la forêt sempervirente africaine. *Mammalia* 53(4): 563-620.
56. Feldhamer, G., D. Drickamer, S. Vessey, J. Merritt, C. Krajewski. 2007. *Mammology: Adaptation, Diversity, and Ecology Third Edition*. Baltimore, MD: Johns Hopkins University Press.
57. Fortin, J. K., Farley, S. D., Rode, K. D., & Robbins, C. T. (2007). Dietary and spatial overlap between sympatric ursids relative to salmon use. *Ursus*, 18(1), 19-29.
58. Fox, M.W. ed. 1975. "The Wild Canids: Their Systematics, Behavioral Ecology and Evolution". Van Nostrand Reinhold Co. New York, NY.
59. Fiorenza, P. 1983. *Encyclopedia of Big Game Animals of Africa*. New York City, New York, USA: Larousse and Co. Inc..

60. Flueck, W. T. 2003. Consideraciones acerca de la calidad nutritiva de hábitat, hábitat óptimo, y evaluación de hábitat para huemul. *In* 4ta reunión Chileno-Argentina sobre estrategias de conservación del huemul. *Edited by* G. Acosta-Jamett. CONAF and CODEFF, Las Trancas, Chile. pp. 30-34.
61. Gade-Jrgensen, I., & Stagegaard, R. (2000). Diet composition of wolves *Canis lupus* in east-central Finland. *Zeszyty Problemowe Postepow Nauk Rolniczych*, 45(4), 537-547.
62. Gagnon, M., & Chew, A. E. (2000). Dietary preferences in extant African Bovidae. *Journal of Mammalogy*, 81(2), 490-511.
63. Gautier-Hion, A., L. H. Emmons, and G. Dubost. 1980. A comparison of the diets of three major groups of primary consumers of Gabon (primates, squirrels and ruminants). *Oecologia* (Berlin); 45: 182-189.
64. Gayot, M. 2004. Comparative diet of the two forest cervids of the genus *Mazama* in French Guiana. *Journal of Tropical Ecology*, 20: 31-43.
65. Gebert, C., & Verheyden-Tixier, H. (2001). Variations of diet composition of red deer (*Cervus elaphus* L.) in Europe. *Mammal Review*, 31(3-4), 189-201.
66. Geelen, L. J. (1999). *A preliminary study of the black-footed rock-wallaby (Petrogale lateralis MacDonnell Ranges race) in the Anangu Pitjantjatjara lands, South Australia* (Doctoral dissertation, University of Adelaide).
67. Giannatos, G., Karypidou, A., Legakis, A., & Polymeni, R. (2010). Golden jackal (*Canis aureus* L.) diet in Southern Greece. *Mammalian Biology-Zeitschrift für Säugetierkunde*, 75(3), 227-232.
68. Godfrey, L. R., Semperebon, G. M., Jungers, W. L., Sutherland, M. R., Simons, E. L., & Solounias, N. (2004). Dental use wear in extinct lemurs: evidence of diet and niche differentiation. *Journal of Human Evolution*, 47(3), 145-169.
69. Grajales-Tam, K. M., Rodríguez-Estrella, R., & Cancino-Hernández, J. (2003). Dieta estacional del coyote *Canis latrans* durante el periodo 1996-1997 en el desierto de vizcaíno, Baja California sur, México. *Acta Zoológica Mexicana*, 89, 17-28.
70. Grassman, L. I., Tewes, M. E., Silvy, N. J., & Kreetiyutanont, K. (2005). Spatial ecology and diet of the dhole *Cuon alpinus* (Canidae, Carnivora) in north central Thailand. *Mammalia mamm*, 69(1), 11-20.
71. Green, M. J. B. 1987. Some ecological aspects of a Himalayan population of musk deer. *In* *Biology and Management of the Cervidae*. *Edited by* C. M. Wemmer. Washington, D. C.: Smithsonian Institution Press. pp. 307-319.
72. Hackmann, T. (2008). *Studies of ruminant digestion, ecology, and evolution* (Doctoral dissertation, University of Missouri--Columbia).
73. Halford, D. A., Bell, D. T., & Loneragan, W. A. (1984). Diet of the western grey kangaroo (*Macropus fuliginosus* Desm.) in a mixed pasture-woodland habitat of Western Australia. *Journal of the Royal Society of Western Australia*.
74. Happold, D.C.D. (1987). *The Mammals of Nigeria*. Clarendon Press, Oxford.
75. Harmsen, B., R. Foster, S. Silver, L. Ostro, C. Doncaster. 2011. Jaguar and puma activity patterns in relation to their main prey. *Mammalian Biology*, 76: 320-324.
76. Hart, J. A. (1992). Forage selection, forest availability, and use of space by Okapi (*Okapia johnstoni*) a rainforest giraffe in Zaire. *Ongules/Ungulates* 91: 217-221.
77. Hayward, M. W., & Kerley, G. I. (2005). Prey preferences of the lion (*Panthera leo*). *Journal of Zoology*, 267(3), 309-322.
78. Heise-Pavlov, S. R., Jackrel, S. L., & Meeks, S. (2011). Conservation of a rare arboreal mammal: habitat preferences of the Lumholtz's tree-kangaroo, *Dendrolagus lumholtzi*. *Australian Mammalogy*, 33(1), 5-12.
79. Henry, O., Feer, F., & Sabatier, D. (2000). Diet of the Lowland Tapir (*Tapirus terrestris* L.) in French Guiana. *Biotropica*, 32(2), 364-368.

80. Herrera, E., D. Macdonald. 1989. Resource Utilization and Territoriality in Group-Living Capybaras (*Hydrochoerus hydrochaeris*). *Journal of Animal Ecology*, 58:2: 667-679.
81. Hill, D. A. (1997). Seasonal variation in the feeding behavior and diet of Japanese macaques (*Macaca fuscata yakui*) in lowland forest of Yakushima. *American Journal of Primatology*, 43(4), 305-320.
82. Hladik, C. M. (1979). Diet and ecology of prosimians. *The study of prosimian behavior*, 307-357.
83. Homolka, M., & Heroldová, M. (1992). Similarity of the results of stomach and faecal contents analyses in studies of the ungulate diet. *Folia Zoologica*, 41(3), 193-208.
84. Hutchins M., D Kleiman, V Geist, M McDade, eds. *Grzimek's Animal Life Encyclopedia*, Vol. 16, 2nd Edition. Farmington Hills, MI: Gale Group.
85. Hylander, W. L. (1975). Incisor size and diet in anthropoids with special reference to Cercopithecidae. *Science*, 189(4208), 1095-1098.
86. Irby, L. 1977. Food habits of Chanler's mountain reedbuck in a rift valley ranch. *East African Wildlife Journal*, 15/4: 289-294.
87. Irlbeck, N. A., & Hume, I. D. (2003). The role of Acacia in the diets of Australian marsupials? A review. *Australian Mammalogy*, 25(2), 121-134.
88. Jackson, J. E. 1987. *Ozotoceros bezoarticus*. *Mammalian Species* 295:1-5.
89. Jaeger, M. M., Haque, E., Sultana, P., & Bruggers, R. L. (2007). Daytime cover, diet and space-use of golden jackals (*Canis aureus*) in agro-ecosystems of Bangladesh. *Mammalia*, 71(1/2), 1-10.
90. Jarman, M. 1979. *Impala Social Behaviour: Territory, Hierarchy, Mating, and the Use of Space*. Berlin: Verlag Paul Parey.
91. Jarman, P. J. (1994). The eating of seedheads by species of Macropodidae. *Australian Mammalogy*, 17, 51-63.
92. Johnsingh, A.J.T., and Sankar, K. (1991). Food plants of chital, sambar, and cattle on Mundanthurai Plateau, Tamil Nadu, South India. *Mammalia* 55(1): 57-66.
93. Julliot, C., & Sabatier, D. (1993). Diet of the red howler monkey (*Alouatta seniculus*) in French Guiana. *International Journal of Primatology*, 14(4), 527-550.
94. Kassim, H., and Baharin, K. (1979). Grazing behaviour of the swamp buffalo (*Bubalus bubalis*). *Pertanika* 2(2): 125-127.
95. Khan, J.A. (1994). Food habits of ungulates in dry tropical forests of Gir Lion Sanctuary, Gujarat, India. *Acta Theriologica* 39(2): 185-193.
96. Kielland, K., J. Bryant. 1998. Moose herbivory in taiga: effects on biogeochemistry and vegetation dynamics in primary succession. *Oikos*, 82: 377-383.
97. King C., ed. *The Handbook of New Zealand Mammals*. Auckland: Oxford University Press.
98. Kotwal, P.C., and Mishra, R.P. (2004). Ecobiology of Indian Wild Buffalo *Bubalus arnee* L. in Udanti Wildlife Sanctuary, Chhattisgarh, India. *Journal of the Bombay Natural History Society* 101(2): 252-254.
99. Kotze, D. C., & Zacharias, P. J. K. (1993). Utilization of woody browse and habitat by the black rhino (*Diceros bicornis*) in western Itala Game Reserve. *African Journal of Range & Forage Science*, 10(1), 36-40.
100. Krishnamani, R. (1994). Diet composition of the bonnet macaque (*Macaca radiata*) in a tropical dry evergreen forest of southern India. *Tropical Biodiversity*, 2(2), 285-302.
101. Krishnan, M. (1972). An ecological survey of the larger mammals of peninsular India. *Journal of the Bombay Natural History Society* 69(3): 469-501.
102. Lad, S. (2012). Diet and Incisor Surface Curvature in Cercopithecids.

103. Landa, A., Strand, O., Swenson, J. E., & Skogland, T. (1997). Wolverines and their prey in southern Norway. *Canadian Journal of Zoology*, 75(8), 1292-1299.
104. Lanszki, J., Kormendi, S., Hancz, C., & Zalewski, A. (1999). Feeding habits and trophic niche overlap in a Carnivora community of Hungary. *Acta Theriologica*, 44(4), 429-442.
105. Lapidge, S. J., & Henshall, S. (2001). Diet Of Foxes And Cats, With Evidence Of Predation On Yellow-Footed Rock-Wallabies (*Petrogale Xanthopus Celeris*) By Foxes In Southwestern Queensland. *Australian Mammalogy*, 23(1), 47-52.
106. Laska, M., J. Luna Baltazar, E. Rodriguez Luna. 2003. Food preferences and nutrient composition in captive pacas, Agouti Paca (Rodentia, Dasyproctidae). *Mammal Biology*, 68: 31-41.
107. Leighton, M., and Leighton, D.R. (1983). Vertebrate responses to fruiting seasonality within a Bornean rain forest. Pp. 181-196 in: Sutton, S.L., Whitmore, T.C. and Chadwick, A.C. (eds.). *Tropical Rain Forest: Ecology and Management*. Blackwell, Oxford.
108. Lindenmayer, D. B. (1997). Differences in the biology and ecology of arboreal marsupials in forests of southeastern Australia. *Journal of Mammalogy*, 1117-1127.
109. Lucherini, M., & Crema, G. (1994). Seasonal variation in diet and trophic niche of the red fox in an Alpine habitat. *Zeitschrift für Säugetierkunde*, 59(1), 1-8.
110. Kingdon, J. 1997. *The Kingdon Field Guide to African Mammals*. San Diego, CA: Academic Press.
111. López-Soto, J. H., Henández, R. E. G., & Badii, M. H. Dieta invernal del Coyote (*Canis latrans*) en un rancho del noreste de México.
112. McArthur, C., & Sanson, G. D. (1988). Tooth wear in eastern grey kangaroos (*Macropus giganteus*) and western grey kangaroos (*Macropus fuliginosus*), and its potential influence on diet selection, digestion and population parameters. *Journal of Zoology*, 215(3), 491-504.
113. Macdonald, D. 1984. *The Encyclopedia of Mammals*. New York NY: Facts on File Publications.
114. Mahaney, W. C. 1987. Behaviour of the African buffalo on Mount Kenya. *African Journal of Ecology* 25: 199-202.
115. Malcolm, J. 1997. The diet of the Ethiopian wolf (*Canis simensis Ruppell*) from a grassland area of the Bale Mountains, Ethiopia. *African Journal of Ecology* 35: 162-164.
116. Marassi, M., & Biancardi, C. (2002). Diet of the Eurasian badger (*Meles meles*) in an area of the Italian Prealps. *Hystrix, the Italian Journal of Mammalogy*, 13(1-2).
117. Meagher, M. (16 June 1986). "Bison bison." *Mammalian Species*. The American Society of Mammalogists, 266.
118. Medel, R., F. Jaksic. 1988. Ecología de los cánidos sudamericanos: una revisión. *Revista Chilena de Historia Natural*, 61: 67-79.
119. Mendoza, M., Janis, C. M., & Palmqvist, P. (2002). Characterizing complex craniodental patterns related to feeding behaviour in ungulates: a multivariate approach. *Journal of Zoology*, 258(2), 223-246.
120. Mendoza, M., & Palmqvist, P. (2005). Characterizing adaptive morphological patterns related to diet in Bovidae (Mammalia: Artiodactyla). *Dong wu xue bao.[Acta zoologica Sinica]*, 52(6), 988-1008.
121. Mendoza, M., & Palmqvist, P. (2008). Hypsodonty in ungulates: an adaptation for grass consumption or for foraging in open habitat?. *Journal of Zoology*, 274(2), 134-142.
122. Mloszewski, M. 1983. *The Behaviour and Ecology of the African Buffalo*. Cambridge University Press. U.S.A.
123. Moreno, R. (2008). Información preliminar sobre la dieta de jaguares y pumas en Cana, Parque Nacional Darién, Panamá.

124. Morse, P. E., Daegling, D. J., McGraw, W. S., & Pampush, J. D. (2013). Dental wear among cercopithecoid monkeys of the Taï forest, Côte d'Ivoire. *American journal of physical anthropology*, 150(4), 655-665.
125. Mudappa, D., Kumar, A., & Chellam, R. Diet and fruit choice of the brown palm civet *Paradoxurus jerdoni*, a viverrid endemic to the Western Ghats rainforest, India [282-300].
126. Mukherjee, S., Goyal, S. P., Johnsingh, A. J. T., & Pitman, M. R. P. (2004). The importance of rodents in the diet of jungle cat (*Felis chaus*), caracal (*Caracal caracal*) and golden jackal (*Canis aureus*) in Sariska Tiger Reserve, Rajasthan, India. *Journal of Zoology*, 262(4), 405-411.
127. Muñoz, A. H. (1991). Dieta de *Felis concolor* (Carnivora: Felidae) en áreas silvestres protegidas del sur de Chile. *Revista Chilena de Historia Natural*, 64, 139-144.
128. Muya, S. M., & Ouge, N. O. (2000). Effects of browse availability and quality on black rhino (*Diceros bicornis michaeli* Groves 1967) diet in Nairobi National Park, Kenya. *African Journal of Ecology*, 38(1), 62-71.
129. Nowak, R. M. (2005). *Walker's Marsupials of the World*. JHU Press.
130. Nowak, R. 1999. *Walker's Mammals of the World (Sixth Edition)*. Baltimore and London: Johns Hopkins University Press.
131. Oates, J. F. (1978). Water-plant and soil consumption by guereza monkeys (*Colobus guereza*): a relationship with minerals and toxins in the diet?. *Biotropica*, 241-253.
132. O'Brien, T. G., & Kinnaird, M. F. (1997). Behavior, diet, and movements of the Sulawesi crested black macaque (*Macaca nigra*). *International Journal of Primatology*, 18(3), 321-351.
133. O'Gara, B. 1978. *Antilocapra americana*. *Mammalian Species*, 90: 1-7.
134. Oli, M. K., Taylor, I. R., & Rogers, D. M. (1993). Diet of the snow leopard (*Panthera uncia*) in the Annapurna Conservation Area, Nepal. *Journal of Zoology*, 231(3), 365-370.
135. Oliver, W.L.R. (1979). Observations of the biology of the pigmy hog (with a footnote on the hispid hare): pigmy hog survey report, part II. *Journal of the Bombay Natural History Society* 76(2): 115-142.
136. Ott, T., Kerley, G. I., & Boshoff, A. F. (2007). Preliminary observations on the diet of leopards (*Panthera pardus*) from a conservation area and adjacent rangelands in the Baviaanskloof region, South Africa. *African Zoology*, 42(1), 31-37.
137. Owen-Smith, N. 1997. Distinctive Features of the Nutritional Ecology of Browsing Versus Grazing Ruminants. *Zeitschrift fuer Saeugetierkunde*, 62: 176-191.
138. Palombit, R. A. (1997). Inter-and intraspecific variation in the diets of sympatric siamang (*Hylobates syndactylus*) and lar gibbons (*Hylobates lar*). *Folia Primatologica*, 68(6), 321-337.
139. Parker S., ed. Grzimek's Encyclopedia of Mammals, Vol. 5, 1 Edition. New York: McGraw-Hill Publishing Company.
140. Pavelka, M. S., & Knopff, K. H. (2004). Diet and activity in black howler monkeys (*Alouatta pigra*) in southern Belize: does degree of frugivory influence activity level?. *Primates*, 45(2), 105-111.
141. Pedó, E., Tomazzoni, A. C., Hartz, S. M., & Christoff, A. U. (2006). Diet of crab-eating fox, *Cerdocyon thous* (Linnaeus) (Carnivora, Canidae), in a suburban area of southern Brazil. *Revista Brasileira de Zoologia*, 23(3), 637-641.
142. Pigozzi, G., & Patterson, I. J. (1990). Movements and diet of crested porcupines in the Maremma natural-park, central Italy. *Acta Theriologica*, 35(3-4), 173-180.
143. Pombo, A. R., Waltert, M., Mansjoer, S. S., Mardiasuti, A., & Mühlenberg, M. (2004). Home range, diet and behaviour of the Tonkean macaque (*Macaca tonkeana*) in Lore Lindu National Park, Sulawesi. In *Land use, nature conservation and the stability of rainforest margins in southeast asia* (pp. 313-325). Springer Berlin Heidelberg.
144. Poulle, M. L., Carles, L., & Lequette, B. (1997). Significance of ungulates in the diet of recently settled wolves in the Mercantour mountains (southeastern France). *Revue d'écologie*, 52(4), 357-368.

145. Prins, H. 1996. *Ecology and Behaviour of the African Buffalo*. Great Britain: Chapman and Hall.
146. Puig, S., M. Cona, F. Videla, E. Mendez. 2010. Diet of the mara (*Dolichotis patagonum*), food availability and effects of an extended drought in Northern Patagonia (Mendoza, Argentina). *Mammalian Biology*, 75/5: 389-398.
147. Quadros, J., & Monteiro-Filho, E. L. (2001). Diet of the neotropical otter, *Lontra longicaudis*, in an Atlantic forest area, Santa Catarina State, southern Brazil. *Studies on Neotropical fauna and Environment*, 36(1), 15-21.
148. Rau, J. R., & Jiménez, J. E. (2002). Diet of puma (*Puma concolor*, Carnivora: Felidae) in coastal and Andean ranges of southern Chile. *Studies on Neotropical Fauna and Environment*, 37(3), 201-205.
149. Richardson, P. R. K. (1987). Food consumption and seasonal variation in the diet of the aardwolf *Proteles cristatus* in southern Africa. *Zeitschrift für Säugetierkunde*, 52(5), 307-325.
150. Riley, E. P. (2007). Flexibility in diet and activity patterns of *Macaca tonkeana* in response to anthropogenic habitat alteration. *International Journal of Primatology*, 28(1), 107-133.
151. Ryan, A. S. (1981). Anterior dental microwear and its relationship to diet and feeding behavior in three african primates (*Pan troglodytes troglodytes*, *Gorilla gorilla gorilla* and *Papio hamadryas*). *Primates*, 22(4), 533-550.
152. Rice, C. G. 1988. Notes on the food habits of Nilgiri tahr. *Journal of the Bombay Natural History Society*; 85: 188-189.
153. Robinson, M. 2005. The Arabian tahr: A review of its biology and conservation. *Caprinae* (Newsletter of the IUCN/SSC Caprinae Specialist Group; October 2005: 2-4.
154. Rodriguez, D., M. Ana Dacar. 2008. Diet composition of the mara (*Dolichotis patagonum*) in the southeast of the Monte desert of La Pampa province, Argentina.. *Mastozoologia Neotropical*, 15/2: 215-220.
155. Roper, T. J., & Lüps, P. (1995). Diet of badgers (*Meles meles*) in central Switzerland: an analysis of stomach contents. *Zeitschrift für Säugetierkunde*, 60(1), 9-19.
156. Salas, L. A., & Fuller, T. K. (1996). Diet of the lowland tapir (*Tapirus terrestris* L.) in the Tabaro River valley, southern Venezuela. *Canadian Journal of Zoology*, 74(8), 1444-1451.
157. Sánchez, F., Gómez-Valencia, B., Álvarez, S. J., & Gómez-Laverde, M. (2008). Primeros datos sobre los hábitos alimentarios del tigrillo, *Leopardus pardalis*, en un bosque andino de Colombia. *Revista UDCA Actualidad & Divulgación Científica*, 11(2), 101-107.
158. Saragih, W; E. V. I., Justina Sadsoeitoeboen, M & Pattiselanno, F. (2010). The diet of spotted cuscus (*Spiloglossus maculatus*) in natural and captivity habitat. *Nusantara Bioscience*, 2(2).
159. Short, J. (1989). The diet of the brush-tailed rock-wallaby in New-South-Wales. *Wildlife Research*, 16(1), 11-18.
160. Schaller, G. May 1996. *Realm of the Snow Antelope*. New York: American Museum of Natural History.
161. Schaller, G. 1998. *Wildlife of the Tibetan Steppe*. Chicago: University of Chicago Press.
162. Semiadil, G., Barry, T. N., Muir, P. D., & Hodgson, J. (1995). Dietary preferences of sambar (*Cervus unicolor*) and red deer (*Cervus elaphus*) offered browse, forage legume and grass species. *The Journal of Agricultural Science*, 125(01), 99-107.
163. Shepherdson, D. J., Roper, T. J., & Lüps, P. (1990). Diet, food availability and foraging behaviour of badgers (*Meles meles* L.) in southern England. *Zeitschrift für Säugetierkunde*, 55(2), 81-93.
164. Sillero-Zubiri, C., & Gottelli, D. (1995). Diet and feeding behavior of Ethiopian wolves (*Canis simensis*). *Journal of Mammalogy*, 76(2), 531-541.
165. Simmen, B., Bayart, F., Marez, A., & Hladik, A. (2007). Diet, nutritional ecology, and birth season of Eulemur macaco in an anthropogenic forest in Madagascar. *International Journal of Primatology*, 28(6), 1253-1266.



166. Smith, S. 1985. *The Atlas of Africa's Principle Mammals*. Sandton: Natural History Books.
167. Shukla, R., and Khare, P.K. (1998). Food habits of wild ungulates and their competition with livestock in Pench Wildlife Reserve, central India. *Journal of the Bombay Natural History Society* **95**(3): 418-421.
168. Sombra, M., A. Mangione. 2005. Obsessed with grasses? The case of mara *Dolichotis patagonum* (Caviidae : Rodentia). *Revista Chilena de Historia Natural*, 78/3: 401-408.
169. SOWLS, L. 1997. *Javelinas and other Peccaries: Their Biology, Management, and Use: Second Edition*. Arizona: Texas A & M University Press.
170. Spencer, L. M. (1995). Morphological correlates of dietary resource partitioning in the African Bovidae. *Journal of Mammalogy*, 448-471.
171. Spina, C. 1986. *The Natural History of Antelopes*. New York, NY, USA: Facts On File Publications.
172. Sponheimer, M., Reed, K. E., & Lee-Thorp, J. A. (1999). Combining isotopic and ecomorphological data to refine bovid paleodietary reconstruction: a case study from the Makapansgat Limeworks hominin locality. *Journal of Human Evolution*, 36(6), 705-718.
173. Sprent, J. A., & McArthur, C. (2002). Diet and diet selection of two species in the macropodid browser-grazer continuum—do they eat what they should? *Australian Journal of Zoology*, 50(2), 183-192.
174. Stafford, K. J. (1997). The diet and trace element status of sambar deer (*Cervus unicolor*) in Manawatu district, New Zealand. *New Zealand Journal of Zoology*, 24(4), 267-271.
175. Stoen, O.G., and Wegge, P. (1996). Prey selection and prey removal by tiger (*Panthera tigris*) during the dry season in lowland Nepal. *Mammalia* **60**(3): 363-373.
176. Stuart, C. and T. Stuart. 1995. *Stuart's Field Guide to the Mammals of Southern Africa*. Cape Town: Struik.
177. Stewart, K. M., Bowyer, R. T., Kie, J. G., Dick, B. L., & Ben-David, M. (2003). Niche partitioning among mule deer, elk, and cattle: Do stable isotopes reflect dietary niche? *Ecoscience*, 10(3), 297-302.
178. Taber, A. B., Novaro, A. J., Neris, N., & Colman, F. H. (1997). The food habits of sympatric jaguar and puma in the Paraguayan Chaco. *Biotropica*, 29(2), 204-213.
179. Tan, C. L. (1999). Group composition, home range size, and diet of three sympatric bamboo lemur species (genus *Haplemur*) in Ranomafana National Park, Madagascar. *International Journal of Primatology*, 20(4), 547-566.
180. Taylor, R. J. (1983). The diet of the eastern grey kangaroo and wallaroo in areas of improved and native pasture in the New England Tablelands. *Wildlife Research*, 10(2), 203-211.
181. Taylor, M. E., & Hannam, A. G. (1987). Tooth microwear and diet in the African Viverridae. *Canadian Journal of Zoology*, 65(7), 1696-1702.
182. Teaford, M. F., & Robinson, J. G. (1989). Seasonal or ecological differences in diet and molar microwear in *Cebus nigrivittatus*. *American Journal of Physical Anthropology*, 80(3), 391-401.
183. Texera, W. A. 1974. Some aspects of the biology of the guemal *Hippocamelus bisulcus* Mammalia Artiodactyla Cervidae in captivity. Part I: Observations on the behavior of the guemal and calculation of some physiological aspects. *Anales del Instituto de la Patagonia*; 5(1-2): 155-166.
184. Theodor, J. M. (2002). Artiodactyla (Even-Toed Ungulates Including Sheep and Camels). *eLS*.
185. Tobler, M. W. (2002). Habitat Use and Diet of Baird's Tapirs (*Tapirus bairdii*) in a Montane Cloud Forest of the Cordillera de Talamanca, Costa Rica. *Biotropica*, 34(3), 468-474.
186. Tomazzoni, A., E. Pedro, S. Hartz. 2005. Feeding associations between capybaras and birds in the Lami Biological Reserve. *Revista Brasileira de Zoologia*, 22:3: 712-716.
187. Turkalo A., J Fay, eds. *Forest Elephant Behavior and Ecology*. New Haven and London: Yale University Press.

188. Urbani, B., & Bosque, C. (2007). Feeding ecology and postural behaviour of the three-toed sloth (*Bradypus variegatus flaccidus*) in northern Venezuela. *Mammalian Biology-Zeitschrift für Säugetierkunde*, 72(6), 321-329.
189. Van Dijk, J., Hauge, K., Landa, A., Andersen, R., & May, R. (2007). Evaluating scat analysis methods to assess wolverine *Gulo gulo* diet. *Wildlife Biology*, 13(sp2), 62-67.
190. Van Rooyen, A. F. 1992. Diets of impala and nyala in two game reserves in Natal, South Africa. *South African Journal of Wildlife Research* 22(4): 98-101.
191. Vernes, K. (1995). The diet of the red-legged pademelon *Thylogale stigmatica* (Gould)(Marsupialia: Macropodidae) in fragmented tropical rainforest, north Queensland, Australia. *Mammalia*, 59(4), 517-526.
192. Wachter, B., Schabel, M., & Noë, R. (1997). Diet overlap and polyspecific associations of red colobus and Diana monkeys in the Tai National Park, Ivory Coast. *Ethology*, 103(6), 514-526.
193. Watanabe, K. (1989). Fish: a new addition to the diet of Japanese macaques on Koshima Island. *Folia Primatologica*, 52(3-4), 124-131.
194. Wegge, P., Shrestha, A.K., and Moe, S.R. (2006). Dry season diets of sympatric ungulates in lowland Nepal: competition and facilitation in alluvial tall grasslands. *Ecological Research* 21(5): 698-706.
195. Vieira, E. M., & De Moraes, D. A. (2003). Carnivory and insectivory in Neotropical marsupials. *Predators with pouches: the biology of carnivorous marsupials*, 267-280.
196. Whitehead, K. G. 1972. *Deer of the world*. New York, USA: The Viking Press, Inc..
197. Whitehead, K. G. 1993. *The Whitehead Encyclopedia of Deer*. Stillwater, MN: Voyageur Press, Inc.
198. Wildlife Africa CC, 2002. "Wildlife Africa - Wild Dog Behavior" (On-line). WildlifeAfrica. Accessed September 24, 2013 at <http://www.wildlifeafrica.co.za/wildogbehavior.html>.
199. Wilson, D., D. Reeder, eds. 1993. *Mammal Species of the World*. Washington, DC: Smithsonian Institution Press.
200. Woolnough, A. P. (1998). *The feeding ecology of the northern hairy-nosed wombat, Lasiorhinus krefftii* (Marsupialia: Vombatidae) (Doctoral dissertation, James Cook University).
201. Woolnough, A. P., & Johnson, C. N. (2000). Assessment of the potential for competition between two sympatric herbivores-the northern hairy-nosed wombat, *Lasiorhinus krefftii*, and the eastern grey kangaroo, *Macropus giganteus*. *Wildlife Research*, 27(3), 301-308.
202. Zucarotto, R., R. Carrara, S. Franco, B. Karina. 2010. Diet of paca (*Cuniculus paca*) using indirect methods in an agricultural area in the Brazilian Atlantic Forest. *Biotemas*, 23/1: 235-239.
