# Supplementary material for: Climate shapes mammal community trophic structures and humans simplify them
Source: PubMed Central journal article supplement (PMC6858300; doi:10.1038/s41467-019-12995-9), 2019-11-15
Supplement: 41467_2019_12995_MOESM5_ESM.pdf [file 41467_2019_12995_MOESM5_ESM.pdf]

|                                   |     |    |    |    |    |    |    |    |    |    |    |    |    |    |    |    |   |   |   |    |
|-----------------------------------|-----|----|----|----|----|----|----|----|----|----|----|----|----|----|----|----|---|---|---|----|
| <i>Rusa marianna</i>              | 25  | 25 | 25 | 0  | 0  | 25 | 0  | 0  | 0  | 0  | 0  | 0  | 0  | 0  | 0  | 0  | 0 | 0 | 0 | GH |
| <i>Rusa timorensis</i>            | 40  | 40 | 0  | 0  | 0  | 0  | 0  | 0  | 0  | 0  | 20 | 0  | 0  | 0  | 0  | 0  | 0 | 0 | 0 | MF |
| <i>Rusa unicolor</i>              | 20  | 20 | 20 | 0  | 0  | 20 | 0  | 0  | 0  | 0  | 20 | 0  | 0  | 0  | 0  | 0  | 0 | 0 | 0 | GH |
| <i>Giraffa camelopardalis</i>     | 0   | 25 | 25 | 25 | 0  | 0  | 0  | 0  | 25 | 0  | 0  | 0  | 0  | 0  | 0  | 0  | 0 | 0 | 0 | SF |
| <i>Okapia johnstoni</i>           | 10  | 70 | 10 | 0  | 0  | 0  | 0  | 0  | 0  | 0  | 0  | 10 | 0  | 0  | 0  | 0  | 0 | 0 | 0 | Fl |
| <i>Hexaprotodon liberiensis</i>   | 20  | 0  | 15 | 0  | 0  | 15 | 0  | 0  | 0  | 35 | 0  | 15 | 0  | 0  | 0  | 0  | 0 | 0 | 0 | GH |
| <i>Hippopotamus amphibius</i>     | 100 | 0  | 0  | 0  | 0  | 0  | 0  | 0  | 0  | 0  | 0  | 0  | 0  | 0  | 0  | 0  | 0 | 0 | 0 | Gr |
| <i>Moschus anhuiensis</i>         | 0   | 15 | 0  | 0  | 50 | 15 | 0  | 0  | 10 | 0  | 10 | 0  | 0  | 0  | 0  | 0  | 0 | 0 | 0 | GH |
| <i>Moschus berezovskii</i>        | 0   | 15 | 0  | 0  | 50 | 15 | 0  | 0  | 10 | 0  | 10 | 0  | 0  | 0  | 0  | 0  | 0 | 0 | 0 | GH |
| <i>Moschus chrysogaster</i>       | 30  | 30 | 0  | 0  | 20 | 0  | 20 | 0  | 0  | 0  | 0  | 0  | 0  | 0  | 0  | 0  | 0 | 0 | 0 | MF |
| <i>Moschus cupreus</i>            | 30  | 30 | 0  | 0  | 20 | 0  | 20 | 0  | 0  | 0  | 0  | 0  | 0  | 0  | 0  | 0  | 0 | 0 | 0 | MF |
| <i>Moschus fuscus</i>             | 30  | 10 | 0  | 0  | 30 | 30 | 0  | 0  | 0  | 0  | 0  | 0  | 0  | 0  | 0  | 0  | 0 | 0 | 0 | MF |
| <i>Moschus leucogaster</i>        | 20  | 20 | 0  | 0  | 20 | 20 | 20 | 0  | 0  | 0  | 0  | 0  | 0  | 0  | 0  | 0  | 0 | 0 | 0 | GH |
| <i>Moschus moschiferus</i>        | 0   | 15 | 0  | 0  | 50 | 15 | 0  | 0  | 10 | 0  | 10 | 0  | 0  | 0  | 0  | 0  | 0 | 0 | 0 | GH |
| <i>Babyrousa babyrussa</i>        | 0   | 25 | 25 | 0  | 0  | 0  | 0  | 10 | 0  | 0  | 0  | 20 | 10 | 0  | 0  | 10 | 0 | 0 | 0 | Om |
| <i>Babyrousa celebensis</i>       | 0   | 0  | 30 | 0  | 0  | 0  | 0  | 30 | 10 | 0  | 0  | 10 | 10 | 0  | 0  | 10 | 0 | 0 | 0 | Om |
| <i>Babyrousa togeanensis</i>      | 0   | 20 | 40 | 0  | 0  | 0  | 0  | 40 | 0  | 0  | 0  | 0  | 0  | 0  | 0  | 0  | 0 | 0 | 0 | Om |
| <i>Hylochoerus meinertzhageni</i> | 40  | 15 | 10 | 0  | 0  | 10 | 0  | 0  | 0  | 10 | 0  | 0  | 0  | 0  | 5  | 10 | 0 | 0 | 0 | MF |
| <i>Phacochoerus aethiopicus</i>   | 45  | 0  | 5  | 0  | 0  | 0  | 0  | 30 | 0  | 0  | 0  | 0  | 5  | 0  | 2  | 13 | 0 | 0 | 0 | MF |
| <i>Phacochoerus africanus</i>     | 50  | 0  | 15 | 0  | 0  | 0  | 0  | 15 | 0  | 0  | 15 | 0  | 0  | 0  | 5  | 0  | 0 | 0 | 0 | Gr |
| <i>Potamochoerus larvatus</i>     | 0   | 0  | 15 | 0  | 0  | 0  | 0  | 30 | 0  | 15 | 0  | 0  | 15 | 0  | 10 | 15 | 0 | 0 | 0 | Om |
| <i>Potamochoerus porcus</i>       | 9   | 0  | 9  | 0  | 0  | 0  | 0  | 19 | 18 | 9  | 0  | 9  | 9  | 0  | 9  | 9  | 0 | 0 | 0 | Om |
| <i>Sus ahoenobarbus</i>           | 0   | 10 | 40 | 0  | 0  | 10 | 0  | 10 | 10 | 0  | 0  | 0  | 10 | 0  | 10 | 0  | 0 | 0 | 0 | Om |
| <i>Sus barbatus</i>               | 0   | 10 | 40 | 0  | 0  | 10 | 0  | 10 | 10 | 0  | 0  | 0  | 10 | 0  | 10 | 0  | 0 | 0 | 0 | Om |
| <i>Sus bucculentus</i>            | 4   | 16 | 8  | 0  | 0  | 8  | 0  | 12 | 16 | 8  | 8  | 4  | 8  | 0  | 4  | 4  | 0 | 0 | 0 | GH |
| <i>Sus cebifrons</i>              | 0   | 0  | 40 | 40 | 0  | 0  | 0  | 0  | 0  | 0  | 0  | 0  | 20 | 0  | 0  | 0  | 0 | 0 | 0 | Fr |
| <i>Sus celebensis</i>             | 0   | 20 | 20 | 0  | 0  | 0  | 0  | 20 | 0  | 0  | 0  | 0  | 20 | 10 | 10 | 0  | 0 | 0 | 0 | Om |
| <i>Sus oliveri</i>                | 0   | 0  | 20 | 0  | 0  | 0  | 0  | 20 | 0  | 0  | 0  | 0  | 20 | 0  | 20 | 20 | 0 | 0 | 0 | Om |
| <i>Sus philippensis</i>           | 0   | 0  | 20 | 0  | 0  | 0  | 0  | 20 | 0  | 0  | 0  | 0  | 20 | 0  | 20 | 20 | 0 | 0 | 0 | Om |
| <i>Sus salvanius</i>              | 0   | 20 | 20 | 0  | 0  | 0  | 0  | 40 | 0  | 0  | 0  | 0  | 10 | 0  | 0  | 10 | 0 | 0 | 0 | Om |
| <i>Sus scrofa</i>                 | 4   | 8  | 8  | 4  | 0  | 8  | 0  | 12 | 16 | 12 | 8  | 4  | 8  | 0  | 4  | 4  | 0 | 0 | 0 | GH |

|                                 |    |    |    |    |   |    |   |    |    |    |   |    |    |    |    |     |    |    |    |    |
|---------------------------------|----|----|----|----|---|----|---|----|----|----|---|----|----|----|----|-----|----|----|----|----|
| <i>Sus verrucosus</i>           | 0  | 10 | 15 | 10 | 0 | 15 | 0 | 25 | 0  | 0  | 0 | 0  | 0  | 0  | 10 | 15  | 0  | 0  | 0  | Om |
| <i>Catagonus wagneri</i>        | 0  | 40 | 0  | 20 | 0 | 0  | 0 | 20 | 20 | 0  | 0 | 0  | 0  | 0  | 0  | 0   | 0  | 0  | 0  | SF |
| <i>Pecari tajacu</i>            | 13 | 12 | 13 | 0  | 0 | 13 | 0 | 28 | 0  | 0  | 0 | 13 | 0  | 0  | 4  | 4   | 0  | 0  | 0  | GH |
| <i>Tayassu pecari</i>           | 0  | 15 | 15 | 0  | 0 | 0  | 0 | 15 | 15 | 0  | 0 | 15 | 15 | 0  | 5  | 5   | 0  | 0  | 0  | Om |
| <i>Hyemoschus aquaticus</i>     | 0  | 30 | 55 | 0  | 0 | 0  | 0 | 0  | 0  | 0  | 0 | 0  | 10 | 0  | 0  | 5   | 0  | 0  | 0  | Fr |
| <i>Moschiola meminna</i>        | 0  | 30 | 40 | 0  | 0 | 30 | 0 | 0  | 0  | 0  | 0 | 0  | 0  | 0  | 0  | 0   | 0  | 0  | 0  | SF |
| <i>Tragulus javanicus</i>       | 0  | 30 | 35 | 0  | 0 | 30 | 0 | 0  | 0  | 0  | 0 | 0  | 5  | 0  | 0  | 0   | 0  | 0  | 0  | SF |
| <i>Tragulus kanchil</i>         | 15 | 15 | 35 | 35 | 0 | 0  | 0 | 0  | 0  | 0  | 0 | 0  | 0  | 0  | 0  | 0   | 0  | 0  | 0  | SF |
| <i>Tragulus napu</i>            | 20 | 25 | 25 | 0  | 0 | 0  | 0 | 0  | 0  | 25 | 0 | 0  | 0  | 0  | 0  | 5   | 0  | 0  | 0  | GH |
| <i>Tragulus nigricans</i>       | 20 | 25 | 25 | 0  | 0 | 0  | 0 | 0  | 0  | 25 | 0 | 0  | 0  | 0  | 0  | 5   | 0  | 0  | 0  | GH |
| <i>Tragulus versicolor</i>      | 20 | 25 | 25 | 0  | 0 | 0  | 0 | 0  | 0  | 25 | 0 | 0  | 0  | 0  | 0  | 5   | 0  | 0  | 0  | GH |
| <i>Tragulus williamsoni</i>     | 20 | 25 | 25 | 0  | 0 | 0  | 0 | 0  | 0  | 25 | 0 | 0  | 0  | 0  | 0  | 5   | 0  | 0  | 0  | GH |
| <i>Ailurus fulgens</i>          | 5  | 65 | 5  | 5  | 5 | 0  | 0 | 5  | 0  | 0  | 0 | 5  | 0  | 0  | 0  | 5   | 0  | 0  | 0  | Fl |
| <i>Atelocynus microtis</i>      | 0  | 0  | 10 | 0  | 0 | 0  | 0 | 0  | 0  | 0  | 0 | 0  | 30 | 30 | 0  | 30  | 0  | 0  | 0  | Ps |
| <i>Canis adustus</i>            | 0  | 0  | 30 | 0  | 0 | 0  | 0 | 0  | 0  | 0  | 0 | 0  | 30 | 0  | 20 | 20  | 0  | 0  | 0  | Om |
| <i>Canis aureus</i>             | 0  | 0  | 45 | 0  | 0 | 0  | 0 | 0  | 0  | 0  | 0 | 0  | 20 | 5  | 5  | 15  | 10 | 0  | 0  | Om |
| <i>Canis latrans</i>            | 0  | 0  | 0  | 0  | 0 | 0  | 0 | 0  | 0  | 0  | 0 | 0  | 5  | 0  | 5  | 90  | 0  | 0  | 0  | SC |
| <i>Canis lupus</i>              | 0  | 0  | 0  | 0  | 0 | 0  | 0 | 0  | 0  | 0  | 0 | 0  | 0  | 0  | 10 | 0   | 0  | 90 | 0  | LC |
| <i>Canis mesomelas</i>          | 0  | 0  | 30 | 0  | 0 | 0  | 0 | 0  | 0  | 0  | 0 | 0  | 50 | 0  | 5  | 10  | 5  | 0  | 0  | Om |
| <i>Canis simensis</i>           | 0  | 0  | 0  | 0  | 0 | 0  | 0 | 0  | 0  | 0  | 0 | 0  | 0  | 0  | 0  | 100 | 0  | 0  | 0  | SC |
| <i>Cerdocyon thous</i>          | 0  | 0  | 0  | 0  | 0 | 0  | 0 | 0  | 0  | 0  | 0 | 0  | 50 | 0  | 0  | 50  | 0  | 0  | 0  | SC |
| <i>Chrysocyon brachyurus</i>    | 0  | 0  | 30 | 0  | 0 | 0  | 0 | 0  | 0  | 0  | 0 | 0  | 0  | 0  | 0  | 30  | 40 | 0  | 0  | Om |
| <i>Cuon alpinus</i>             | 0  | 0  | 5  | 0  | 0 | 0  | 0 | 0  | 0  | 0  | 0 | 0  | 0  | 0  | 0  | 5   | 0  | 45 | 45 | LC |
| <i>Lycalopex culpaeus</i>       | 0  | 0  | 10 | 0  | 0 | 0  | 0 | 0  | 0  | 0  | 0 | 0  | 20 | 0  | 10 | 30  | 30 | 0  | 0  | Om |
| <i>Lycalopex fulvipes</i>       | 0  | 0  | 5  | 0  | 0 | 0  | 0 | 0  | 10 | 0  | 0 | 0  | 30 | 0  | 5  | 50  | 0  | 0  | 0  | SC |
| <i>Lycalopex griseus</i>        | 0  | 0  | 15 | 0  | 0 | 0  | 0 | 0  | 10 | 0  | 0 | 0  | 10 | 0  | 25 | 30  | 10 | 0  | 0  | Om |
| <i>Lycalopex gymnocercus</i>    | 0  | 5  | 10 | 0  | 0 | 0  | 0 | 0  | 0  | 0  | 0 | 0  | 0  | 0  | 0  | 60  | 25 | 0  | 0  | SC |
| <i>Lycalopex sechurae</i>       | 0  | 0  | 20 | 0  | 0 | 0  | 0 | 0  | 20 | 0  | 0 | 0  | 20 | 0  | 20 | 20  | 0  | 0  | 0  | Om |
| <i>Lycalopex vetulus</i>        | 0  | 0  | 5  | 0  | 0 | 0  | 0 | 0  | 0  | 0  | 0 | 0  | 90 | 0  | 0  | 5   | 0  | 0  | 0  | IF |
| <i>Lycaon pictus</i>            | 0  | 0  | 0  | 0  | 0 | 0  | 0 | 0  | 0  | 0  | 0 | 0  | 0  | 0  | 0  | 0   | 0  | 50 | 50 | LC |
| <i>Nyctereutes procyonoides</i> | 0  | 0  | 0  | 0  | 0 | 0  | 0 | 0  | 0  | 0  | 0 | 0  | 40 | 20 | 20 | 20  | 0  | 0  | 0  | Ps |



|                                 |    |    |    |    |   |    |   |    |   |   |   |   |    |   |    |     |    |    |   |    |
|---------------------------------|----|----|----|----|---|----|---|----|---|---|---|---|----|---|----|-----|----|----|---|----|
| <i>Otocyon megalotis</i>        | 0  | 0  | 5  | 0  | 0 | 0  | 0 | 0  | 0 | 0 | 0 | 0 | 90 | 0 | 0  | 5   | 0  | 0  | 0 | IF |
| <i>Speothos venaticus</i>       | 0  | 0  | 0  | 0  | 0 | 0  | 0 | 0  | 0 | 0 | 0 | 0 | 0  | 0 | 0  | 0   | 65 | 35 | 0 | SC |
| <i>Urocyon cinereoargenteus</i> | 0  | 0  | 20 | 0  | 0 | 15 | 0 | 0  | 0 | 0 | 0 | 0 | 10 | 0 | 10 | 40  | 5  | 0  | 0 | Om |
| <i>Urocyon littoralis</i>       | 0  | 0  | 45 | 0  | 0 | 0  | 0 | 0  | 0 | 0 | 0 | 0 | 45 | 0 | 2  | 8   | 0  | 0  | 0 | Fr |
| <i>Vulpes bengalensis</i>       | 0  | 0  | 0  | 25 | 0 | 0  | 0 | 0  | 0 | 0 | 0 | 0 | 50 | 0 | 0  | 25  | 0  | 0  | 0 | IF |
| <i>Vulpes cana</i>              | 0  | 0  | 50 | 0  | 0 | 0  | 0 | 0  | 0 | 0 | 0 | 0 | 45 | 0 | 0  | 5   | 0  | 0  | 0 | Fr |
| <i>Vulpes chama</i>             | 0  | 0  | 15 | 0  | 0 | 5  | 0 | 0  | 0 | 0 | 0 | 0 | 35 | 0 | 5  | 35  | 5  | 0  | 0 | Om |
| <i>Vulpes corsac</i>            | 0  | 0  | 5  | 0  | 0 | 5  | 0 | 0  | 0 | 0 | 0 | 0 | 25 | 0 | 25 | 40  | 0  | 0  | 0 | Om |
| <i>Vulpes ferrilata</i>         | 0  | 0  | 0  | 0  | 0 | 0  | 0 | 0  | 0 | 0 | 0 | 0 | 0  | 0 | 10 | 55  | 35 | 0  | 0 | SC |
| <i>Vulpes lagopus</i>           | 0  | 0  | 15 | 0  | 0 | 0  | 0 | 0  | 0 | 0 | 0 | 0 | 15 | 5 | 20 | 45  | 0  | 0  | 0 | SC |
| <i>Vulpes macrotis</i>          | 0  | 0  | 15 | 0  | 0 | 0  | 0 | 0  | 0 | 0 | 0 | 0 | 0  | 0 | 15 | 35  | 35 | 0  | 0 | Om |
| <i>Vulpes pallida</i>           | 0  | 0  | 20 | 0  | 0 | 15 | 0 | 0  | 0 | 0 | 0 | 0 | 25 | 0 | 0  | 40  | 0  | 0  | 0 | Om |
| <i>Vulpes rueppellii</i>        | 0  | 0  | 0  | 0  | 0 | 0  | 0 | 20 | 0 | 0 | 0 | 0 | 55 | 0 | 0  | 25  | 0  | 0  | 0 | IF |
| <i>Vulpes velox</i>             | 20 | 0  | 20 | 0  | 0 | 0  | 0 | 0  | 0 | 0 | 0 | 0 | 20 | 0 | 20 | 20  | 0  | 0  | 0 | Om |
| <i>Vulpes vulpes</i>            | 0  | 0  | 20 | 0  | 0 | 0  | 0 | 0  | 0 | 0 | 0 | 0 | 15 | 0 | 15 | 30  | 20 | 0  | 0 | Om |
| <i>Vulpes zerda</i>             | 0  | 20 | 20 | 0  | 0 | 0  | 0 | 20 | 0 | 0 | 0 | 0 | 20 | 0 | 0  | 20  | 0  | 0  | 0 | Om |
| <i>Cryptoprocta ferox</i>       | 0  | 0  | 0  | 0  | 0 | 0  | 0 | 0  | 0 | 0 | 0 | 0 | 20 | 0 | 0  | 40  | 40 | 0  | 0 | SC |
| <i>Acinonyx jubatus</i>         | 0  | 0  | 0  | 0  | 0 | 0  | 0 | 0  | 0 | 0 | 0 | 0 | 0  | 0 | 0  | 0   | 80 | 20 | 0 | SC |
| <i>Caracal caracal</i>          | 0  | 0  | 0  | 0  | 0 | 0  | 0 | 0  | 0 | 0 | 0 | 0 | 0  | 0 | 0  | 60  | 40 | 0  | 0 | SC |
| <i>Catopuma badia</i>           | 0  | 0  | 0  | 0  | 0 | 0  | 0 | 0  | 0 | 0 | 0 | 0 | 0  | 0 | 20 | 50  | 30 | 0  | 0 | SC |
| <i>Catopuma temminckii</i>      | 0  | 0  | 0  | 0  | 0 | 0  | 0 | 0  | 0 | 0 | 0 | 0 | 0  | 0 | 0  | 50  | 50 | 0  | 0 | SC |
| <i>Felis bieti</i>              | 0  | 0  | 0  | 0  | 0 | 0  | 0 | 0  | 0 | 0 | 0 | 0 | 0  | 0 | 0  | 100 | 0  | 0  | 0 | SC |
| <i>Felis chaus</i>              | 0  | 0  | 10 | 0  | 0 | 0  | 0 | 0  | 0 | 0 | 0 | 0 | 13 | 2 | 0  | 55  | 15 | 5  | 0 | SC |
| <i>Felis manul</i>              | 0  | 0  | 0  | 0  | 0 | 0  | 0 | 0  | 0 | 0 | 0 | 0 | 5  | 0 | 5  | 90  | 0  | 0  | 0 | SC |
| <i>Felis margarita</i>          | 0  | 0  | 0  | 0  | 0 | 0  | 0 | 0  | 0 | 0 | 0 | 0 | 10 | 0 | 0  | 90  | 0  | 0  | 0 | SC |
| <i>Felis nigripes</i>           | 0  | 0  | 0  | 0  | 0 | 0  | 0 | 0  | 0 | 0 | 0 | 0 | 0  | 0 | 0  | 100 | 0  | 0  | 0 | SC |
| <i>Felis silvestris</i>         | 0  | 0  | 0  | 0  | 0 | 0  | 0 | 0  | 0 | 0 | 0 | 0 | 15 | 0 | 15 | 40  | 30 | 0  | 0 | SC |
| <i>Leopardus braccatus</i>      | 0  | 0  | 0  | 0  | 0 | 0  | 0 | 0  | 0 | 0 | 0 | 0 | 0  | 0 | 0  | 70  | 30 | 0  | 0 | SC |
| <i>Leopardus colocolo</i>       | 0  | 0  | 0  | 0  | 0 | 0  | 0 | 0  | 0 | 0 | 0 | 0 | 0  | 0 | 0  | 100 | 0  | 0  | 0 | SC |
| <i>Leopardus geoffroyi</i>      | 0  | 0  | 0  | 0  | 0 | 0  | 0 | 0  | 0 | 0 | 0 | 0 | 0  | 2 | 0  | 98  | 0  | 0  | 0 | SC |
| <i>Leopardus guigna</i>         | 0  | 0  | 0  | 0  | 0 | 0  | 0 | 0  | 0 | 0 | 0 | 0 | 15 | 0 | 0  | 85  | 0  | 0  | 0 | SC |

|                                  |   |   |    |   |   |   |   |   |   |   |   |     |    |    |     |    |     |    |    |    |
|----------------------------------|---|---|----|---|---|---|---|---|---|---|---|-----|----|----|-----|----|-----|----|----|----|
| <i>Leopardus jacobitus</i>       | 0 | 0 | 0  | 0 | 0 | 0 | 0 | 0 | 0 | 0 | 0 | 0   | 0  | 0  | 0   | 80 | 20  | 0  | 0  | SC |
| <i>Leopardus pajeros</i>         | 0 | 0 | 0  | 0 | 0 | 0 | 0 | 0 | 0 | 0 | 0 | 0   | 0  | 0  | 0   | 80 | 20  | 0  | 0  | SC |
| <i>Leopardus pardalis</i>        | 0 | 0 | 0  | 0 | 0 | 0 | 0 | 0 | 0 | 0 | 0 | 2   | 2  | 0  | 86  | 10 | 0   | 0  | SC |    |
| <i>Leopardus tigrinus</i>        | 5 | 0 | 0  | 0 | 0 | 0 | 0 | 0 | 0 | 0 | 0 | 0   | 0  | 35 | 60  | 0  | 0   | 0  | SC |    |
| <i>Leopardus wiedii</i>          | 0 | 0 | 0  | 0 | 0 | 0 | 0 | 0 | 0 | 0 | 0 | 0   | 0  | 0  | 95  | 5  | 0   | 0  | SC |    |
| <i>Leptailurus serval</i>        | 0 | 0 | 0  | 0 | 0 | 0 | 0 | 0 | 0 | 0 | 0 | 2   | 0  | 2  | 96  | 0  | 0   | 0  | SC |    |
| <i>Lynx canadensis</i>           | 0 | 0 | 0  | 0 | 0 | 0 | 0 | 0 | 0 | 0 | 0 | 0   | 0  | 2  | 50  | 45 | 3   | 0  | SC |    |
| <i>Lynx lynx</i>                 | 0 | 0 | 0  | 0 | 0 | 0 | 0 | 0 | 0 | 0 | 0 | 0   | 0  | 0  | 0   | 0  | 100 | 0  | LC |    |
| <i>Lynx pardinus</i>             | 0 | 0 | 0  | 0 | 0 | 0 | 0 | 0 | 0 | 0 | 0 | 0   | 0  | 0  | 50  | 50 | 0   | 0  | SC |    |
| <i>Lynx rufus</i>                | 0 | 0 | 0  | 0 | 0 | 0 | 0 | 0 | 0 | 0 | 0 | 0   | 0  | 0  | 80  | 20 | 0   | 0  | SC |    |
| <i>Neofelis nebulosa</i>         | 0 | 0 | 0  | 0 | 0 | 0 | 0 | 0 | 0 | 0 | 0 | 0   | 0  | 0  | 0   | 0  | 85  | 15 | LC |    |
| <i>Panthera leo</i>              | 0 | 0 | 0  | 0 | 0 | 0 | 0 | 0 | 0 | 0 | 0 | 0   | 0  | 10 | 0   | 0  | 20  | 70 | LC |    |
| <i>Panthera onca</i>             | 0 | 0 | 0  | 0 | 0 | 0 | 0 | 0 | 0 | 0 | 0 | 0   | 0  | 0  | 0   | 0  | 50  | 50 | LC |    |
| <i>Panthera pardus</i>           | 0 | 0 | 0  | 0 | 0 | 0 | 0 | 0 | 0 | 0 | 0 | 0   | 0  | 0  | 0   | 0  | 100 | 0  | LC |    |
| <i>Panthera tigris</i>           | 0 | 0 | 0  | 0 | 0 | 0 | 0 | 0 | 0 | 0 | 0 | 0   | 0  | 10 | 0   | 5  | 15  | 70 | LC |    |
| <i>Pardofelis marmorata</i>      | 0 | 0 | 0  | 0 | 0 | 0 | 0 | 0 | 0 | 0 | 0 | 0   | 0  | 0  | 100 | 0  | 0   | 0  | SC |    |
| <i>Prionailurus bengalensis</i>  | 0 | 0 | 0  | 0 | 0 | 0 | 0 | 0 | 0 | 0 | 0 | 5   | 0  | 0  | 95  | 0  | 0   | 0  | SC |    |
| <i>Prionailurus iriomotensis</i> | 0 | 0 | 0  | 0 | 0 | 0 | 0 | 0 | 0 | 0 | 0 | 2   | 2  | 0  | 96  | 0  | 0   | 0  | SC |    |
| <i>Prionailurus planiceps</i>    | 0 | 0 | 0  | 0 | 0 | 0 | 0 | 0 | 0 | 0 | 0 | 10  | 80 | 0  | 10  | 0  | 0   | 0  | Ps |    |
| <i>Prionailurus rubiginosus</i>  | 0 | 0 | 0  | 0 | 0 | 0 | 0 | 0 | 0 | 0 | 0 | 5   | 0  | 0  | 95  | 0  | 0   | 0  | SC |    |
| <i>Prionailurus viverrinus</i>   | 5 | 0 | 0  | 0 | 0 | 0 | 0 | 0 | 0 | 0 | 0 | 15  | 70 | 0  | 10  | 0  | 0   | 0  | Ps |    |
| <i>Profelis aurata</i>           | 0 | 0 | 0  | 0 | 0 | 0 | 0 | 0 | 0 | 0 | 0 | 0   | 2  | 0  | 83  | 15 | 0   | 0  | SC |    |
| <i>Puma concolor</i>             | 0 | 0 | 0  | 0 | 0 | 0 | 0 | 0 | 0 | 0 | 0 | 0   | 0  | 0  | 0   | 10 | 70  | 20 | LC |    |
| <i>Puma yagouaroundi</i>         | 0 | 5 | 0  | 0 | 0 | 0 | 0 | 0 | 0 | 0 | 0 | 5   | 5  | 0  | 85  | 0  | 0   | 0  | SC |    |
| <i>Uncia uncia</i>               | 0 | 0 | 0  | 0 | 0 | 0 | 0 | 0 | 0 | 0 | 0 | 0   | 0  | 10 | 10  | 15 | 65  | 0  | LC |    |
| <i>Crocota crocuta</i>           | 0 | 0 | 0  | 0 | 0 | 0 | 0 | 0 | 0 | 0 | 0 | 0   | 0  | 30 | 0   | 0  | 35  | 35 | LC |    |
| <i>Hyaena brunnea</i>            | 0 | 0 | 10 | 0 | 0 | 0 | 0 | 0 | 0 | 0 | 0 | 10  | 0  | 70 | 10  | 0  | 0   | 0  | Om |    |
| <i>Hyaena hyaena</i>             | 0 | 0 | 10 | 0 | 0 | 0 | 0 | 0 | 0 | 0 | 0 | 10  | 0  | 75 | 5   | 0  | 0   | 0  | Om |    |
| <i>Proteles cristata</i>         | 0 | 0 | 0  | 0 | 0 | 0 | 0 | 0 | 0 | 0 | 0 | 100 | 0  | 0  | 0   | 0  | 0   | 0  | IF |    |
| <i>Aonyx capensis</i>            | 0 | 0 | 0  | 0 | 0 | 0 | 0 | 0 | 0 | 0 | 0 | 70  | 15 | 0  | 15  | 0  | 0   | 0  | IF |    |
| <i>Aonyx cinerea</i>             | 0 | 0 | 0  | 0 | 0 | 0 | 0 | 0 | 0 | 0 | 0 | 70  | 15 | 0  | 15  | 0  | 0   | 0  | IF |    |

|                                |    |    |    |    |   |    |   |    |    |   |   |    |    |     |    |    |    |    |   |    |
|--------------------------------|----|----|----|----|---|----|---|----|----|---|---|----|----|-----|----|----|----|----|---|----|
| <i>Arctonyx collaris</i>       | 0  | 0  | 30 | 0  | 0 | 0  | 0 | 10 | 0  | 0 | 0 | 0  | 30 | 0   | 0  | 30 | 0  | 0  | 0 | Om |
| <i>Eira barbara</i>            | 0  | 0  | 30 | 0  | 0 | 0  | 0 | 0  | 0  | 0 | 0 | 0  | 30 | 0   | 0  | 40 | 0  | 0  | 0 | Om |
| <i>Galictis vittata</i>        | 0  | 0  | 0  | 0  | 0 | 0  | 0 | 0  | 0  | 0 | 0 | 0  | 0  | 0   | 0  | 40 | 60 | 0  | 0 | SC |
| <i>Gulo gulo</i>               | 0  | 0  | 5  | 0  | 0 | 0  | 0 | 5  | 5  | 0 | 0 | 0  | 0  | 0   | 50 | 10 | 15 | 10 | 0 | Om |
| <i>Hydrictis maculicollis</i>  | 0  | 0  | 0  | 0  | 0 | 0  | 0 | 0  | 0  | 0 | 0 | 0  | 20 | 70  | 0  | 10 | 0  | 0  | 0 | Ps |
| <i>Lontra canadensis</i>       | 0  | 0  | 5  | 0  | 0 | 0  | 0 | 0  | 0  | 0 | 0 | 0  | 20 | 65  | 0  | 10 | 0  | 0  | 0 | Ps |
| <i>Lontra longicaudis</i>      | 0  | 0  | 0  | 0  | 0 | 0  | 0 | 0  | 0  | 0 | 0 | 0  | 20 | 70  | 0  | 10 | 0  | 0  | 0 | Ps |
| <i>Lontra provocax</i>         | 0  | 0  | 0  | 0  | 0 | 0  | 0 | 0  | 0  | 0 | 0 | 0  | 15 | 75  | 0  | 10 | 0  | 0  | 0 | Ps |
| <i>Lutra lutra</i>             | 0  | 5  | 0  | 0  | 0 | 0  | 0 | 0  | 0  | 0 | 0 | 0  | 20 | 65  | 0  | 10 | 0  | 0  | 0 | Ps |
| <i>Lutra sumatrana</i>         | 0  | 0  | 0  | 0  | 0 | 0  | 0 | 0  | 0  | 0 | 0 | 0  | 20 | 80  | 0  | 0  | 0  | 0  | 0 | Ps |
| <i>Lutrogale perspicillata</i> | 0  | 0  | 0  | 0  | 0 | 0  | 0 | 0  | 0  | 0 | 0 | 0  | 20 | 70  | 0  | 10 | 0  | 0  | 0 | Ps |
| <i>Martes pennanti</i>         | 0  | 0  | 10 | 0  | 0 | 0  | 0 | 0  | 10 | 0 | 0 | 10 | 10 | 0   | 0  | 10 | 50 | 0  | 0 | Om |
| <i>Meles anakuma</i>           | 0  | 0  | 40 | 0  | 0 | 0  | 0 | 0  | 0  | 0 | 0 | 0  | 40 | 0   | 20 | 0  | 0  | 0  | 0 | Fr |
| <i>Meles leucurus</i>          | 0  | 5  | 10 | 0  | 0 | 5  | 0 | 0  | 10 | 0 | 0 | 0  | 60 | 0   | 0  | 10 | 0  | 0  | 0 | IF |
| <i>Meles meles</i>             | 0  | 0  | 5  | 0  | 0 | 0  | 0 | 5  | 5  | 0 | 0 | 5  | 50 | 5   | 5  | 20 | 0  | 0  | 0 | IF |
| <i>Mellivora capensis</i>      | 0  | 10 | 10 | 0  | 0 | 0  | 0 | 5  | 0  | 0 | 0 | 0  | 25 | 0   | 25 | 25 | 0  | 0  | 0 | Om |
| <i>Melogale everetti</i>       | 0  | 0  | 10 | 0  | 0 | 0  | 0 | 0  | 0  | 0 | 0 | 0  | 70 | 0   | 10 | 10 | 0  | 0  | 0 | IF |
| <i>Pteronura brasiliensis</i>  | 0  | 0  | 0  | 0  | 0 | 0  | 0 | 0  | 0  | 0 | 0 | 0  | 0  | 100 | 0  | 0  | 0  | 0  | 0 | Ps |
| <i>Taxidea taxus</i>           | 0  | 0  | 0  | 0  | 0 | 0  | 0 | 0  | 5  | 0 | 0 | 0  | 5  | 5   | 5  | 40 | 40 | 0  | 0 | SC |
| <i>Nasua narica</i>            | 0  | 0  | 25 | 0  | 0 | 0  | 0 | 0  | 0  | 0 | 0 | 0  | 25 | 0   | 25 | 25 | 0  | 0  | 0 | Om |
| <i>Nasua nasua</i>             | 0  | 10 | 25 | 0  | 0 | 0  | 0 | 0  | 0  | 0 | 0 | 0  | 30 | 0   | 10 | 25 | 0  | 0  | 0 | Om |
| <i>Procyon cancrivorus</i>     | 0  | 8  | 52 | 0  | 0 | 0  | 0 | 0  | 8  | 0 | 0 | 0  | 16 | 8   | 0  | 8  | 0  | 0  | 0 | Fr |
| <i>Procyon lotor</i>           | 0  | 10 | 25 | 0  | 0 | 10 | 0 | 0  | 15 | 0 | 0 | 0  | 20 | 5   | 5  | 10 | 0  | 0  | 0 | Om |
| <i>Procyon pygmaeus</i>        | 0  | 0  | 15 | 0  | 0 | 0  | 0 | 0  | 0  | 0 | 0 | 0  | 70 | 0   | 0  | 15 | 0  | 0  | 0 | IF |
| <i>Ailuropoda melanoleuca</i>  | 0  | 80 | 5  | 0  | 0 | 0  | 0 | 0  | 0  | 0 | 0 | 0  | 5  | 5   | 0  | 5  | 0  | 0  | 0 | Fl |
| <i>Helarctos malayanus</i>     | 0  | 5  | 20 | 0  | 0 | 0  | 0 | 0  | 0  | 0 | 0 | 0  | 60 | 0   | 5  | 10 | 0  | 0  | 0 | IF |
| <i>Melursus ursinus</i>        | 0  | 10 | 40 | 10 | 0 | 0  | 0 | 0  | 0  | 0 | 0 | 0  | 40 | 0   | 0  | 0  | 0  | 0  | 0 | Om |
| <i>Tremarctos ornatus</i>      | 0  | 40 | 35 | 5  | 0 | 0  | 5 | 0  | 0  | 0 | 5 | 0  | 5  | 0   | 0  | 5  | 0  | 0  | 0 | SF |
| <i>Ursus americanus</i>        | 20 | 20 | 20 | 20 | 0 | 0  | 0 | 0  | 0  | 0 | 0 | 0  | 10 | 0   | 10 | 0  | 0  | 0  | 0 | SF |
| <i>Ursus arctos</i>            | 6  | 3  | 10 | 0  | 0 | 3  | 3 | 18 | 13 | 3 | 0 | 2  | 12 | 10  | 12 | 0  | 0  | 3  | 2 | LC |
| <i>Ursus thibetanus</i>        | 0  | 0  | 11 | 0  | 0 | 0  | 0 | 21 | 15 | 0 | 8 | 0  | 10 | 0   | 10 | 10 | 5  | 10 | 0 | Om |







|                                 |     |     |    |    |   |    |   |    |    |    |    |   |     |   |   |   |   |   |   |    |
|---------------------------------|-----|-----|----|----|---|----|---|----|----|----|----|---|-----|---|---|---|---|---|---|----|
| <i>Equus burchellii</i>         | 80  | 10  | 0  | 0  | 0 | 10 | 0 | 0  | 0  | 0  | 0  | 0 | 0   | 0 | 0 | 0 | 0 | 0 | 0 | Gr |
| <i>Equus caballus</i>           | 100 | 0   | 0  | 0  | 0 | 0  | 0 | 0  | 0  | 0  | 0  | 0 | 0   | 0 | 0 | 0 | 0 | 0 | 0 | Gr |
| <i>Equus grevyi</i>             | 80  | 10  | 0  | 0  | 0 | 10 | 0 | 0  | 0  | 0  | 0  | 0 | 0   | 0 | 0 | 0 | 0 | 0 | 0 | Gr |
| <i>Equus hemionus</i>           | 80  | 0   | 0  | 0  | 0 | 10 | 0 | 0  | 0  | 0  | 10 | 0 | 0   | 0 | 0 | 0 | 0 | 0 | 0 | Gr |
| <i>Equus kiang</i>              | 80  | 10  | 0  | 0  | 0 | 10 | 0 | 0  | 0  | 0  | 0  | 0 | 0   | 0 | 0 | 0 | 0 | 0 | 0 | Gr |
| <i>Equus zebra</i>              | 80  | 10  | 0  | 0  | 0 | 10 | 0 | 0  | 0  | 0  | 0  | 0 | 0   | 0 | 0 | 0 | 0 | 0 | 0 | Gr |
| <i>Ceratotherium simum</i>      | 100 | 0   | 0  | 0  | 0 | 0  | 0 | 0  | 0  | 0  | 0  | 0 | 0   | 0 | 0 | 0 | 0 | 0 | 0 | Gr |
| <i>Dicerorhinus sumatrensis</i> | 0   | 40  | 20 | 0  | 0 | 0  | 0 | 0  | 20 | 0  | 20 | 0 | 0   | 0 | 0 | 0 | 0 | 0 | 0 | SF |
| <i>Diceros bicornis</i>         | 20  | 40  | 0  | 0  | 0 | 20 | 0 | 0  | 0  | 0  | 20 | 0 | 0   | 0 | 0 | 0 | 0 | 0 | 0 | MF |
| <i>Rhinoceros sondaicus</i>     | 0   | 60  | 20 | 0  | 0 | 20 | 0 | 0  | 0  | 0  | 0  | 0 | 0   | 0 | 0 | 0 | 0 | 0 | 0 | FI |
| <i>Rhinoceros unicornis</i>     | 50  | 20  | 20 | 0  | 0 | 0  | 0 | 0  | 0  | 10 | 0  | 0 | 0   | 0 | 0 | 0 | 0 | 0 | 0 | MF |
| <i>Tapirus bairdii</i>          | 10  | 60  | 10 | 10 | 0 | 0  | 0 | 0  | 0  | 10 | 0  | 0 | 0   | 0 | 0 | 0 | 0 | 0 | 0 | FI |
| <i>Tapirus indicus</i>          | 0   | 20  | 20 | 0  | 0 | 8  | 8 | 8  | 0  | 8  | 28 | 0 | 0   | 0 | 0 | 0 | 0 | 0 | 0 | GH |
| <i>Tapirus pinchaque</i>        | 40  | 40  | 20 | 0  | 0 | 0  | 0 | 0  | 0  | 0  | 0  | 0 | 0   | 0 | 0 | 0 | 0 | 0 | 0 | MF |
| <i>Tapirus terrestris</i>       | 20  | 40  | 20 | 0  | 0 | 0  | 0 | 0  | 0  | 20 | 0  | 0 | 0   | 0 | 0 | 0 | 0 | 0 | 0 | GH |
| <i>Manis crassicaudata</i>      | 0   | 0   | 0  | 0  | 0 | 0  | 0 | 0  | 0  | 0  | 0  | 0 | 100 | 0 | 0 | 0 | 0 | 0 | 0 | IF |
| <i>Manis culionensis</i>        | 0   | 0   | 0  | 0  | 0 | 0  | 0 | 0  | 0  | 0  | 0  | 0 | 100 | 0 | 0 | 0 | 0 | 0 | 0 | IF |
| <i>Manis gigantea</i>           | 0   | 0   | 0  | 0  | 0 | 0  | 0 | 0  | 0  | 0  | 0  | 0 | 100 | 0 | 0 | 0 | 0 | 0 | 0 | IF |
| <i>Manis javanica</i>           | 0   | 0   | 0  | 0  | 0 | 0  | 0 | 0  | 0  | 0  | 0  | 0 | 100 | 0 | 0 | 0 | 0 | 0 | 0 | IF |
| <i>Manis pentadactyla</i>       | 0   | 0   | 0  | 0  | 0 | 0  | 0 | 0  | 0  | 0  | 0  | 0 | 100 | 0 | 0 | 0 | 0 | 0 | 0 | IF |
| <i>Manis temminckii</i>         | 0   | 0   | 0  | 0  | 0 | 0  | 0 | 0  | 0  | 0  | 0  | 0 | 100 | 0 | 0 | 0 | 0 | 0 | 0 | IF |
| <i>Manis tricuspis</i>          | 0   | 0   | 0  | 0  | 0 | 0  | 0 | 0  | 0  | 0  | 0  | 0 | 100 | 0 | 0 | 0 | 0 | 0 | 0 | IF |
| <i>Bradypus pygmaeus</i>        | 0   | 100 | 0  | 0  | 0 | 0  | 0 | 0  | 0  | 0  | 0  | 0 | 0   | 0 | 0 | 0 | 0 | 0 | 0 | FI |
| <i>Bradypus torquatus</i>       | 0   | 100 | 0  | 0  | 0 | 0  | 0 | 0  | 0  | 0  | 0  | 0 | 0   | 0 | 0 | 0 | 0 | 0 | 0 | FI |
| <i>Bradypus tridactylus</i>     | 0   | 100 | 0  | 0  | 0 | 0  | 0 | 0  | 0  | 0  | 0  | 0 | 0   | 0 | 0 | 0 | 0 | 0 | 0 | FI |
| <i>Bradypus variegatus</i>      | 0   | 40  | 30 | 30 | 0 | 0  | 0 | 0  | 0  | 0  | 0  | 0 | 0   | 0 | 0 | 0 | 0 | 0 | 0 | SF |
| <i>Choloepus didactylus</i>     | 0   | 44  | 44 | 0  | 0 | 0  | 0 | 10 | 0  | 0  | 0  | 0 | 2   | 0 | 0 | 0 | 0 | 0 | 0 | SF |
| <i>Choloepus hoffmanni</i>      | 0   | 55  | 15 | 15 | 0 | 0  | 0 | 0  | 0  | 0  | 0  | 0 | 5   | 0 | 5 | 5 | 0 | 0 | 0 | FI |
| <i>Myrmecophaga tridactyla</i>  | 0   | 0   | 0  | 0  | 0 | 0  | 0 | 0  | 0  | 0  | 0  | 0 | 100 | 0 | 0 | 0 | 0 | 0 | 0 | IF |
| <i>Tamandua mexicana</i>        | 0   | 0   | 0  | 0  | 0 | 0  | 0 | 0  | 0  | 0  | 0  | 0 | 100 | 0 | 0 | 0 | 0 | 0 | 0 | IF |
| <i>Tamandua tetradactyla</i>    | 0   | 0   | 0  | 0  | 0 | 0  | 0 | 0  | 0  | 0  | 0  | 0 | 100 | 0 | 0 | 0 | 0 | 0 | 0 | IF |

|                                    |   |    |    |    |   |   |   |   |    |   |    |    |    |   |   |    |   |   |   |    |
|------------------------------------|---|----|----|----|---|---|---|---|----|---|----|----|----|---|---|----|---|---|---|----|
| <i>Alouatta belzebul</i>           | 0 | 85 | 0  | 5  | 0 | 0 | 0 | 0 | 0  | 0 | 10 | 0  | 0  | 0 | 0 | 0  | 0 | 0 | 0 | Fl |
| <i>Alouatta caraya</i>             | 0 | 80 | 10 | 10 | 0 | 0 | 0 | 0 | 0  | 0 | 0  | 0  | 0  | 0 | 0 | 0  | 0 | 0 | 0 | Fl |
| <i>Alouatta coibensis</i>          | 0 | 70 | 15 | 15 | 0 | 0 | 0 | 0 | 0  | 0 | 0  | 0  | 0  | 0 | 0 | 0  | 0 | 0 | 0 | Fl |
| <i>Alouatta guariba</i>            | 0 | 80 | 10 | 10 | 0 | 0 | 0 | 0 | 0  | 0 | 0  | 0  | 0  | 0 | 0 | 0  | 0 | 0 | 0 | Fl |
| <i>Alouatta macconnelli</i>        | 0 | 55 | 15 | 15 | 0 | 0 | 0 | 0 | 15 | 0 | 0  | 0  | 0  | 0 | 0 | 0  | 0 | 0 | 0 | Fl |
| <i>Alouatta nigerrima</i>          | 0 | 55 | 15 | 15 | 0 | 0 | 0 | 0 | 15 | 0 | 0  | 0  | 0  | 0 | 0 | 0  | 0 | 0 | 0 | Fl |
| <i>Alouatta palliata</i>           | 0 | 45 | 39 | 16 | 0 | 0 | 0 | 0 | 0  | 0 | 0  | 0  | 0  | 0 | 0 | 0  | 0 | 0 | 0 | SF |
| <i>Alouatta pigra</i>              | 0 | 43 | 43 | 14 | 0 | 0 | 0 | 0 | 0  | 0 | 0  | 0  | 0  | 0 | 0 | 0  | 0 | 0 | 0 | SF |
| <i>Alouatta sara</i>               | 0 | 55 | 15 | 15 | 0 | 0 | 0 | 0 | 15 | 0 | 0  | 0  | 0  | 0 | 0 | 0  | 0 | 0 | 0 | Fl |
| <i>Alouatta seniculus</i>          | 0 | 43 | 43 | 14 | 0 | 0 | 0 | 0 | 0  | 0 | 0  | 0  | 0  | 0 | 0 | 0  | 0 | 0 | 0 | SF |
| <i>Ateles belzebuth</i>            | 0 | 10 | 84 | 0  | 0 | 0 | 0 | 0 | 2  | 0 | 2  | 0  | 2  | 0 | 0 | 0  | 0 | 0 | 0 | Fr |
| <i>Ateles chamek</i>               | 0 | 20 | 60 | 4  | 0 | 0 | 0 | 0 | 0  | 0 | 0  | 0  | 8  | 0 | 0 | 8  | 0 | 0 | 0 | Fr |
| <i>Ateles fusciceps</i>            | 0 | 40 | 40 | 0  | 0 | 0 | 0 | 0 | 12 | 0 | 0  | 0  | 6  | 0 | 0 | 2  | 0 | 0 | 0 | SF |
| <i>Ateles geoffroyi</i>            | 0 | 4  | 82 | 4  | 0 | 0 | 0 | 0 | 4  | 0 | 4  | 0  | 2  | 0 | 0 | 0  | 0 | 0 | 0 | Fr |
| <i>Ateles hybridus</i>             | 0 | 5  | 85 | 5  | 0 | 0 | 0 | 0 | 5  | 0 | 0  | 0  | 0  | 0 | 0 | 0  | 0 | 0 | 0 | Fr |
| <i>Ateles marginatus</i>           | 0 | 10 | 60 | 10 | 0 | 0 | 0 | 5 | 0  | 0 | 10 | 0  | 5  | 0 | 0 | 0  | 0 | 0 | 0 | Fr |
| <i>Ateles paniscus</i>             | 0 | 10 | 83 | 3  | 0 | 0 | 0 | 1 | 2  | 0 | 0  | 1  | 0  | 0 | 0 | 0  | 0 | 0 | 0 | Fr |
| <i>Brachyteles arachnoides</i>     | 0 | 50 | 30 | 10 | 0 | 0 | 0 | 0 | 10 | 0 | 0  | 0  | 0  | 0 | 0 | 0  | 0 | 0 | 0 | Fl |
| <i>Brachyteles hypoxanthus</i>     | 0 | 50 | 30 | 10 | 0 | 0 | 0 | 0 | 10 | 0 | 0  | 0  | 0  | 0 | 0 | 0  | 0 | 0 | 0 | Fl |
| <i>Lagothrix cana</i>              | 0 | 15 | 80 | 0  | 0 | 0 | 0 | 0 | 5  | 0 | 0  | 0  | 0  | 0 | 0 | 0  | 0 | 0 | 0 | Fr |
| <i>Lagothrix lagotricha</i>        | 0 | 10 | 75 | 0  | 0 | 0 | 0 | 0 | 10 | 0 | 0  | 0  | 5  | 0 | 0 | 0  | 0 | 0 | 0 | Fr |
| <i>Lagothrix lugens</i>            | 0 | 14 | 83 | 2  | 0 | 0 | 0 | 0 | 0  | 0 | 1  | 0  | 0  | 0 | 0 | 0  | 0 | 0 | 0 | Fr |
| <i>Lagothrix poeppigii</i>         | 0 | 10 | 73 | 5  | 0 | 0 | 0 | 0 | 0  | 0 | 0  | 2  | 10 | 0 | 0 | 0  | 0 | 0 | 0 | Fr |
| <i>Oreonax flavicauda</i>          | 0 | 10 | 73 | 7  | 0 | 0 | 0 | 0 | 0  | 0 | 0  | 0  | 10 | 0 | 0 | 0  | 0 | 0 | 0 | Fr |
| <i>Allenopithecus nigroviridis</i> | 0 | 40 | 40 | 0  | 0 | 0 | 0 | 0 | 0  | 0 | 0  | 0  | 20 | 0 | 0 | 0  | 0 | 0 | 0 | SF |
| <i>Cercocebus agilis</i>           | 0 | 10 | 30 | 0  | 0 | 0 | 0 | 0 | 40 | 0 | 0  | 10 | 5  | 0 | 0 | 5  | 0 | 0 | 0 | Om |
| <i>Cercocebus atys</i>             | 0 | 5  | 30 | 5  | 0 | 0 | 0 | 0 | 50 | 0 | 0  | 0  | 5  | 0 | 0 | 5  | 0 | 0 | 0 | Om |
| <i>Cercocebus chrysogaster</i>     | 0 | 10 | 30 | 0  | 0 | 0 | 0 | 0 | 40 | 0 | 0  | 10 | 5  | 0 | 0 | 5  | 0 | 0 | 0 | Om |
| <i>Cercocebus galeritus</i>        | 0 | 10 | 35 | 0  | 0 | 0 | 0 | 0 | 35 | 0 | 0  | 0  | 10 | 0 | 0 | 10 | 0 | 0 | 0 | Om |
| <i>Cercocebus sanjei</i>           | 0 | 9  | 65 | 0  | 0 | 0 | 0 | 0 | 16 | 0 | 0  | 0  | 5  | 0 | 0 | 5  | 0 | 0 | 0 | Fr |
| <i>Cercocebus torquatus</i>        | 0 | 10 | 40 | 0  | 0 | 0 | 0 | 0 | 40 | 0 | 0  | 0  | 5  | 0 | 0 | 5  | 0 | 0 | 0 | Om |



|                                    |   |    |    |    |   |    |   |    |    |   |   |    |    |   |   |    |   |   |   |    |
|------------------------------------|---|----|----|----|---|----|---|----|----|---|---|----|----|---|---|----|---|---|---|----|
| <i>Cercopithecus albogularis</i>   | 0 | 10 | 60 | 0  | 0 | 0  | 0 | 0  | 10 | 0 | 0 | 0  | 10 | 0 | 0 | 10 | 0 | 0 | 0 | Fr |
| <i>Cercopithecus ascanius</i>      | 0 | 15 | 60 | 15 | 0 | 0  | 0 | 0  | 0  | 0 | 0 | 0  | 10 | 0 | 0 | 0  | 0 | 0 | 0 | Fr |
| <i>Cercopithecus campbelli</i>     | 0 | 10 | 60 | 0  | 0 | 0  | 0 | 0  | 10 | 0 | 0 | 0  | 10 | 0 | 0 | 10 | 0 | 0 | 0 | Fr |
| <i>Cercopithecus cephus</i>        | 0 | 10 | 60 | 0  | 0 | 0  | 0 | 0  | 10 | 0 | 0 | 0  | 10 | 0 | 0 | 10 | 0 | 0 | 0 | Fr |
| <i>Cercopithecus denti</i>         | 0 | 15 | 65 | 0  | 0 | 0  | 0 | 0  | 15 | 0 | 0 | 0  | 5  | 0 | 0 | 0  | 0 | 0 | 0 | Fr |
| <i>Cercopithecus diana</i>         | 0 | 10 | 40 | 10 | 0 | 0  | 0 | 0  | 0  | 0 | 0 | 0  | 40 | 0 | 0 | 0  | 0 | 0 | 0 | Om |
| <i>Cercopithecus doggetti</i>      | 0 | 30 | 65 | 0  | 0 | 0  | 0 | 0  | 0  | 0 | 0 | 0  | 5  | 0 | 0 | 0  | 0 | 0 | 0 | Fr |
| <i>Cercopithecus dryas</i>         | 0 | 15 | 60 | 15 | 0 | 0  | 0 | 0  | 0  | 0 | 0 | 0  | 10 | 0 | 0 | 0  | 0 | 0 | 0 | Fr |
| <i>Cercopithecus erythrogaster</i> | 0 | 15 | 70 | 0  | 0 | 0  | 0 | 0  | 0  | 0 | 0 | 0  | 15 | 0 | 0 | 0  | 0 | 0 | 0 | Fr |
| <i>Cercopithecus erythrotis</i>    | 0 | 15 | 60 | 15 | 0 | 0  | 0 | 0  | 0  | 0 | 0 | 0  | 10 | 0 | 0 | 0  | 0 | 0 | 0 | Fr |
| <i>Cercopithecus hamlyni</i>       | 0 | 90 | 10 | 0  | 0 | 0  | 0 | 0  | 0  | 0 | 0 | 0  | 0  | 0 | 0 | 0  | 0 | 0 | 0 | Fl |
| <i>Cercopithecus kandti</i>        | 0 | 40 | 30 | 20 | 0 | 0  | 0 | 0  | 0  | 0 | 0 | 0  | 10 | 0 | 0 | 0  | 0 | 0 | 0 | SF |
| <i>Cercopithecus lhoesti</i>       | 0 | 19 | 19 | 0  | 0 | 19 | 0 | 19 | 0  | 0 | 0 | 18 | 3  | 0 | 0 | 3  | 0 | 0 | 0 | GH |
| <i>Cercopithecus lowei</i>         | 0 | 20 | 70 | 0  | 0 | 0  | 0 | 0  | 0  | 0 | 0 | 0  | 10 | 0 | 0 | 0  | 0 | 0 | 0 | Fr |
| <i>Cercopithecus mitis</i>         | 0 | 30 | 45 | 5  | 0 | 0  | 0 | 0  | 10 | 0 | 0 | 0  | 10 | 0 | 0 | 0  | 0 | 0 | 0 | SF |
| <i>Cercopithecus mona</i>          | 0 | 15 | 60 | 0  | 0 | 0  | 0 | 0  | 0  | 0 | 0 | 0  | 25 | 0 | 0 | 0  | 0 | 0 | 0 | Fr |
| <i>Cercopithecus neglectus</i>     | 0 | 15 | 60 | 15 | 0 | 0  | 0 | 0  | 0  | 0 | 0 | 0  | 10 | 0 | 0 | 0  | 0 | 0 | 0 | Fr |
| <i>Cercopithecus nictitans</i>     | 0 | 8  | 48 | 8  | 0 | 0  | 0 | 0  | 28 | 0 | 0 | 0  | 8  | 0 | 0 | 0  | 0 | 0 | 0 | Fr |
| <i>Cercopithecus petaurista</i>    | 0 | 50 | 40 | 0  | 0 | 0  | 0 | 0  | 0  | 0 | 0 | 0  | 10 | 0 | 0 | 0  | 0 | 0 | 0 | SF |
| <i>Cercopithecus pogonias</i>      | 0 | 10 | 60 | 10 | 0 | 0  | 0 | 0  | 10 | 0 | 0 | 0  | 10 | 0 | 0 | 0  | 0 | 0 | 0 | Fr |
| <i>Cercopithecus preussi</i>       | 0 | 30 | 40 | 0  | 0 | 0  | 0 | 0  | 0  | 0 | 0 | 0  | 30 | 0 | 0 | 0  | 0 | 0 | 0 | SF |
| <i>Cercopithecus roloway</i>       | 0 | 15 | 40 | 15 | 0 | 0  | 0 | 0  | 15 | 0 | 0 | 0  | 15 | 0 | 0 | 0  | 0 | 0 | 0 | Om |
| <i>Cercopithecus sclateri</i>      | 0 | 20 | 45 | 0  | 0 | 0  | 0 | 0  | 20 | 0 | 0 | 0  | 15 | 0 | 0 | 0  | 0 | 0 | 0 | Om |
| <i>Cercopithecus solatus</i>       | 0 | 20 | 40 | 0  | 0 | 0  | 0 | 0  | 20 | 0 | 0 | 0  | 10 | 0 | 0 | 10 | 0 | 0 | 0 | Om |
| <i>Cercopithecus wolffi</i>        | 0 | 10 | 60 | 10 | 0 | 0  | 0 | 0  | 10 | 0 | 0 | 0  | 10 | 0 | 0 | 0  | 0 | 0 | 0 | Fr |
| <i>Chlorocebus aethiops</i>        | 0 | 20 | 40 | 0  | 0 | 0  | 0 | 0  | 20 | 0 | 0 | 0  | 10 | 0 | 0 | 10 | 0 | 0 | 0 | Om |
| <i>Chlorocebus cynosuroides</i>    | 0 | 15 | 35 | 15 | 0 | 0  | 0 | 0  | 15 | 0 | 0 | 0  | 10 | 0 | 0 | 10 | 0 | 0 | 0 | Om |
| <i>Chlorocebus djamdjamensis</i>   | 0 | 20 | 35 | 20 | 0 | 0  | 0 | 0  | 15 | 0 | 0 | 0  | 10 | 0 | 0 | 0  | 0 | 0 | 0 | SF |
| <i>Chlorocebus pygerythrus</i>     | 0 | 20 | 35 | 20 | 0 | 0  | 0 | 0  | 15 | 0 | 0 | 0  | 5  | 0 | 0 | 5  | 0 | 0 | 0 | SF |
| <i>Chlorocebus sabaeanus</i>       | 0 | 25 | 35 | 20 | 0 | 0  | 0 | 0  | 15 | 0 | 0 | 0  | 5  | 0 | 0 | 0  | 0 | 0 | 0 | SF |
| <i>Chlorocebus tantalus</i>        | 0 | 20 | 35 | 20 | 0 | 0  | 0 | 0  | 15 | 0 | 0 | 0  | 5  | 0 | 0 | 5  | 0 | 0 | 0 | SF |

|                               |    |    |    |    |   |    |   |    |    |    |    |    |    |   |   |    |   |   |   |    |
|-------------------------------|----|----|----|----|---|----|---|----|----|----|----|----|----|---|---|----|---|---|---|----|
| <i>Colobus angolensis</i>     | 0  | 13 | 35 | 13 | 0 | 0  | 0 | 0  | 0  | 13 | 13 | 0  | 13 | 0 | 0 | 0  | 0 | 0 | 0 | Om |
| <i>Colobus guereza</i>        | 0  | 85 | 10 | 0  | 0 | 0  | 0 | 0  | 0  | 5  | 0  | 0  | 0  | 0 | 0 | 0  | 0 | 0 | 0 | Fl |
| <i>Colobus polykomos</i>      | 0  | 80 | 10 | 10 | 0 | 0  | 0 | 0  | 0  | 0  | 0  | 0  | 0  | 0 | 0 | 0  | 0 | 0 | 0 | Fl |
| <i>Colobus satanas</i>        | 0  | 10 | 10 | 10 | 0 | 0  | 0 | 0  | 70 | 0  | 0  | 0  | 0  | 0 | 0 | 0  | 0 | 0 | 0 | Om |
| <i>Colobus vellerosus</i>     | 0  | 45 | 10 | 0  | 0 | 0  | 0 | 0  | 40 | 0  | 0  | 0  | 5  | 0 | 0 | 0  | 0 | 0 | 0 | SF |
| <i>Erythrocebus patas</i>     | 0  | 10 | 40 | 0  | 0 | 0  | 0 | 10 | 0  | 0  | 0  | 0  | 30 | 0 | 0 | 10 | 0 | 0 | 0 | Om |
| <i>Lophocebus albigena</i>    | 0  | 8  | 25 | 8  | 0 | 0  | 0 | 0  | 43 | 0  | 0  | 0  | 8  | 0 | 0 | 8  | 0 | 0 | 0 | Om |
| <i>Lophocebus aterrimus</i>   | 0  | 0  | 40 | 0  | 0 | 0  | 0 | 0  | 30 | 0  | 0  | 0  | 15 | 0 | 0 | 15 | 0 | 0 | 0 | Om |
| <i>Lophocebus opdenboschi</i> | 0  | 0  | 40 | 0  | 0 | 0  | 0 | 0  | 30 | 0  | 0  | 0  | 15 | 0 | 0 | 15 | 0 | 0 | 0 | Om |
| <i>Macaca arctoides</i>       | 0  | 10 | 40 | 10 | 0 | 0  | 0 | 10 | 10 | 0  | 0  | 0  | 10 | 0 | 0 | 10 | 0 | 0 | 0 | Om |
| <i>Macaca assamensis</i>      | 0  | 15 | 35 | 15 | 0 | 0  | 0 | 5  | 15 | 0  | 0  | 0  | 10 | 0 | 0 | 5  | 0 | 0 | 0 | Om |
| <i>Macaca cyclopis</i>        | 0  | 15 | 40 | 0  | 0 | 0  | 0 | 0  | 15 | 0  | 0  | 0  | 15 | 0 | 0 | 15 | 0 | 0 | 0 | Om |
| <i>Macaca fascicularis</i>    | 0  | 5  | 73 | 5  | 0 | 0  | 0 | 5  | 0  | 0  | 5  | 0  | 0  | 3 | 0 | 4  | 0 | 0 | 0 | Fr |
| <i>Macaca fuscata</i>         | 0  | 5  | 50 | 0  | 0 | 5  | 0 | 6  | 16 | 0  | 3  | 5  | 5  | 0 | 0 | 5  | 0 | 0 | 0 | Fr |
| <i>Macaca hecki</i>           | 0  | 5  | 75 | 5  | 0 | 0  | 0 | 5  | 0  | 0  | 5  | 0  | 0  | 0 | 0 | 5  | 0 | 0 | 0 | Fr |
| <i>Macaca leonina</i>         | 0  | 8  | 55 | 0  | 0 | 0  | 0 | 5  | 8  | 0  | 0  | 8  | 8  | 0 | 0 | 8  | 0 | 0 | 0 | Fr |
| <i>Macaca maura</i>           | 0  | 18 | 28 | 0  | 0 | 0  | 0 | 0  | 18 | 0  | 0  | 0  | 18 | 0 | 0 | 18 | 0 | 0 | 0 | Om |
| <i>Macaca mulatta</i>         | 0  | 10 | 25 | 9  | 0 | 9  | 0 | 6  | 12 | 0  | 8  | 5  | 8  | 3 | 0 | 5  | 0 | 0 | 0 | Om |
| <i>Macaca nemestrina</i>      | 0  | 6  | 50 | 3  | 0 | 5  | 0 | 6  | 12 | 0  | 0  | 6  | 6  | 0 | 0 | 6  | 0 | 0 | 0 | Fr |
| <i>Macaca nigra</i>           | 0  | 10 | 60 | 10 | 0 | 0  | 0 | 0  | 0  | 0  | 0  | 0  | 10 | 0 | 0 | 10 | 0 | 0 | 0 | Fr |
| <i>Macaca nigrescens</i>      | 0  | 10 | 70 | 10 | 0 | 0  | 0 | 0  | 0  | 0  | 0  | 0  | 10 | 0 | 0 | 0  | 0 | 0 | 0 | Fr |
| <i>Macaca ochreata</i>        | 0  | 25 | 55 | 0  | 0 | 0  | 0 | 0  | 5  | 0  | 0  | 0  | 15 | 0 | 0 | 0  | 0 | 0 | 0 | Fr |
| <i>Macaca pagensis</i>        | 0  | 10 | 50 | 5  | 0 | 2  | 0 | 4  | 10 | 0  | 2  | 2  | 8  | 0 | 0 | 7  | 0 | 0 | 0 | Fr |
| <i>Macaca radiata</i>         | 0  | 15 | 40 | 0  | 0 | 0  | 0 | 0  | 20 | 0  | 0  | 0  | 20 | 0 | 0 | 5  | 0 | 0 | 0 | Om |
| <i>Macaca siberu</i>          | 0  | 5  | 85 | 5  | 0 | 0  | 0 | 0  | 5  | 0  | 0  | 0  | 0  | 0 | 0 | 0  | 0 | 0 | 0 | Fr |
| <i>Macaca silenus</i>         | 0  | 10 | 60 | 10 | 0 | 0  | 0 | 0  | 0  | 0  | 0  | 10 | 5  | 0 | 0 | 5  | 0 | 0 | 0 | Fr |
| <i>Macaca sinica</i>          | 0  | 15 | 60 | 15 | 0 | 0  | 0 | 0  | 0  | 0  | 0  | 0  | 5  | 0 | 0 | 5  | 0 | 0 | 0 | Fr |
| <i>Macaca sylvanus</i>        | 0  | 10 | 15 | 0  | 0 | 10 | 0 | 10 | 22 | 0  | 7  | 10 | 10 | 0 | 0 | 6  | 0 | 0 | 0 | Om |
| <i>Macaca thibetana</i>       | 24 | 24 | 24 | 7  | 0 | 0  | 0 | 7  | 7  | 0  | 0  | 0  | 7  | 0 | 0 | 0  | 0 | 0 | 0 | GH |
| <i>Macaca tonkeana</i>        | 0  | 15 | 55 | 0  | 0 | 0  | 0 | 0  | 15 | 0  | 0  | 0  | 15 | 0 | 0 | 0  | 0 | 0 | 0 | Fr |
| <i>Mandrillus leucophaeus</i> | 0  | 10 | 50 | 0  | 0 | 10 | 0 | 10 | 0  | 0  | 0  | 0  | 10 | 0 | 0 | 10 | 0 | 0 | 0 | Fr |





|                                 |   |     |    |    |   |   |   |    |    |   |   |   |    |   |   |   |   |   |    |
|---------------------------------|---|-----|----|----|---|---|---|----|----|---|---|---|----|---|---|---|---|---|----|
| <i>Gorilla gorilla</i>          | 0 | 15  | 80 | 0  | 0 | 0 | 0 | 0  | 0  | 0 | 0 | 0 | 5  | 0 | 0 | 0 | 0 | 0 | Fr |
| <i>Pan paniscus</i>             | 0 | 10  | 50 | 9  | 0 | 0 | 0 | 19 | 9  | 0 | 0 | 3 | 0  | 0 | 0 | 0 | 0 | 0 | Fr |
| <i>Pan troglodytes</i>          | 0 | 18  | 30 | 5  | 0 | 0 | 0 | 0  | 25 | 0 | 2 | 0 | 7  | 0 | 0 | 5 | 5 | 3 | Om |
| <i>Pongo abelii</i>             | 0 | 24  | 59 | 6  | 0 | 0 | 0 | 0  | 0  | 0 | 4 | 0 | 5  | 0 | 0 | 1 | 1 | 0 | Fr |
| <i>Pongo pygmaeus</i>           | 0 | 10  | 65 | 6  | 0 | 0 | 0 | 0  | 0  | 0 | 6 | 0 | 6  | 0 | 0 | 6 | 1 | 0 | Fr |
| <i>Bunopithecus hoolock</i>     | 0 | 10  | 75 | 5  | 0 | 0 | 0 | 0  | 0  | 0 | 0 | 0 | 10 | 0 | 0 | 0 | 0 | 0 | Fr |
| <i>Hylobates agilis</i>         | 0 | 10  | 74 | 10 | 0 | 0 | 0 | 0  | 0  | 0 | 0 | 0 | 3  | 0 | 0 | 3 | 0 | 0 | Fr |
| <i>Hylobates albibarbis</i>     | 0 | 10  | 74 | 10 | 0 | 0 | 0 | 0  | 0  | 0 | 0 | 0 | 3  | 0 | 0 | 3 | 0 | 0 | Fr |
| <i>Hylobates klossii</i>        | 0 | 10  | 74 | 10 | 0 | 0 | 0 | 0  | 0  | 0 | 0 | 0 | 3  | 0 | 0 | 3 | 0 | 0 | Fr |
| <i>Hylobates lar</i>            | 0 | 30  | 50 | 9  | 0 | 0 | 0 | 0  | 0  | 0 | 0 | 0 | 11 | 0 | 0 | 0 | 0 | 0 | Fr |
| <i>Hylobates moloch</i>         | 0 | 10  | 74 | 10 | 0 | 0 | 0 | 0  | 0  | 0 | 0 | 0 | 3  | 0 | 0 | 3 | 0 | 0 | Fr |
| <i>Hylobates muelleri</i>       | 0 | 10  | 80 | 10 | 0 | 0 | 0 | 0  | 0  | 0 | 0 | 0 | 0  | 0 | 0 | 0 | 0 | 0 | Fr |
| <i>Hylobates pileatus</i>       | 0 | 14  | 69 | 0  | 0 | 0 | 0 | 0  | 0  | 0 | 0 | 0 | 14 | 0 | 0 | 3 | 0 | 0 | Fr |
| <i>Nomascus concolor</i>        | 0 | 20  | 72 | 5  | 0 | 0 | 0 | 0  | 0  | 0 | 0 | 0 | 0  | 0 | 0 | 3 | 0 | 0 | Fr |
| <i>Nomascus gabriellae</i>      | 0 | 11  | 75 | 11 | 0 | 0 | 0 | 0  | 0  | 0 | 0 | 0 | 3  | 0 | 0 | 0 | 0 | 0 | Fr |
| <i>Nomascus hainanus</i>        | 0 | 5   | 90 | 5  | 0 | 0 | 0 | 0  | 0  | 0 | 0 | 0 | 0  | 0 | 0 | 0 | 0 | 0 | Fr |
| <i>Nomascus leucogenys</i>      | 0 | 11  | 75 | 11 | 0 | 0 | 0 | 0  | 0  | 0 | 0 | 0 | 3  | 0 | 0 | 0 | 0 | 0 | Fr |
| <i>Nomascus siki</i>            | 0 | 5   | 90 | 5  | 0 | 0 | 0 | 0  | 0  | 0 | 0 | 0 | 0  | 0 | 0 | 0 | 0 | 0 | Fr |
| <i>Symphalangus syndactylus</i> | 0 | 20  | 72 | 5  | 0 | 0 | 0 | 0  | 0  | 0 | 0 | 0 | 0  | 0 | 0 | 3 | 0 | 0 | Fr |
| <i>Avahi unicolor</i>           | 0 | 100 | 0  | 0  | 0 | 0 | 0 | 0  | 0  | 0 | 0 | 0 | 0  | 0 | 0 | 0 | 0 | 0 | Fl |
| <i>Indri indri</i>              | 0 | 74  | 13 | 13 | 0 | 0 | 0 | 0  | 0  | 0 | 0 | 0 | 0  | 0 | 0 | 0 | 0 | 0 | Fl |
| <i>Propithecus coquereli</i>    | 0 | 70  | 10 | 10 | 0 | 0 | 0 | 0  | 5  | 0 | 5 | 0 | 0  | 0 | 0 | 0 | 0 | 0 | Fl |
| <i>Propithecus deckenii</i>     | 0 | 74  | 13 | 13 | 0 | 0 | 0 | 0  | 0  | 0 | 0 | 0 | 0  | 0 | 0 | 0 | 0 | 0 | Fl |
| <i>Propithecus diadema</i>      | 0 | 74  | 13 | 13 | 0 | 0 | 0 | 0  | 0  | 0 | 0 | 0 | 0  | 0 | 0 | 0 | 0 | 0 | Fl |
| <i>Propithecus edwardsi</i>     | 0 | 40  | 8  | 8  | 0 | 0 | 0 | 0  | 40 | 0 | 0 | 4 | 0  | 0 | 0 | 0 | 0 | 0 | SF |
| <i>Propithecus perrieri</i>     | 0 | 50  | 17 | 16 | 0 | 0 | 0 | 0  | 17 | 0 | 0 | 0 | 0  | 0 | 0 | 0 | 0 | 0 | Fl |
| <i>Propithecus tattersalli</i>  | 0 | 35  | 37 | 9  | 0 | 0 | 0 | 0  | 17 | 0 | 2 | 0 | 0  | 0 | 0 | 0 | 0 | 0 | SF |
| <i>Propithecus verreauxi</i>    | 0 | 70  | 9  | 8  | 0 | 0 | 0 | 0  | 5  | 0 | 8 | 0 | 0  | 0 | 0 | 0 | 0 | 0 | Fl |
| <i>Eulemur albifrons</i>        | 0 | 12  | 64 | 12 | 0 | 0 | 0 | 0  | 0  | 0 | 0 | 0 | 12 | 0 | 0 | 0 | 0 | 0 | Fr |
| <i>Eulemur collaris</i>         | 0 | 12  | 60 | 12 | 0 | 0 | 0 | 0  | 5  | 0 | 0 | 0 | 11 | 0 | 0 | 0 | 0 | 0 | Fr |
| <i>Eulemur coronatus</i>        | 0 | 20  | 70 | 5  | 0 | 0 | 0 | 0  | 0  | 0 | 0 | 0 | 5  | 0 | 0 | 0 | 0 | 0 | Fr |

|                                  |    |    |    |    |   |    |   |    |    |    |    |    |    |   |   |   |   |   |   |    |
|----------------------------------|----|----|----|----|---|----|---|----|----|----|----|----|----|---|---|---|---|---|---|----|
| <i>Eulemur fulvus</i>            | 0  | 58 | 8  | 7  | 0 | 0  | 0 | 0  | 0  | 0  | 7  | 10 | 10 | 0 | 0 | 0 | 0 | 0 | 0 | Fr |
| <i>Eulemur macaco</i>            | 0  | 5  | 48 | 37 | 0 | 0  | 0 | 0  | 0  | 0  | 5  | 5  | 0  | 0 | 0 | 0 | 0 | 0 | 0 | Fr |
| <i>Eulemur rubriventer</i>       | 0  | 12 | 61 | 12 | 0 | 0  | 0 | 0  | 0  | 0  | 0  | 0  | 15 | 0 | 0 | 0 | 0 | 0 | 0 | Fr |
| <i>Eulemur rufus</i>             | 0  | 12 | 61 | 12 | 0 | 0  | 0 | 0  | 0  | 0  | 0  | 0  | 15 | 0 | 0 | 0 | 0 | 0 | 0 | Fr |
| <i>Eulemur sanfordi</i>          | 0  | 15 | 65 | 15 | 0 | 0  | 0 | 0  | 0  | 0  | 0  | 0  | 5  | 0 | 0 | 0 | 0 | 0 | 0 | Fr |
| <i>Varecia rubra</i>             | 0  | 5  | 95 | 0  | 0 | 0  | 0 | 0  | 0  | 0  | 0  | 0  | 0  | 0 | 0 | 0 | 0 | 0 | 0 | Fr |
| <i>Varecia variegata</i>         | 0  | 10 | 80 | 10 | 0 | 0  | 0 | 0  | 0  | 0  | 0  | 0  | 0  | 0 | 0 | 0 | 0 | 0 | 0 | Fr |
| <i>Elephas maximus</i>           | 60 | 15 | 0  | 0  | 0 | 5  | 0 | 5  | 0  | 5  | 10 | 0  | 0  | 0 | 0 | 0 | 0 | 0 | 0 | Gr |
| <i>Loxodonta africana</i>        | 16 | 17 | 16 | 0  | 0 | 0  | 0 | 17 | 0  | 2  | 32 | 0  | 0  | 0 | 0 | 0 | 0 | 0 | 0 | GH |
| <i>Loxodonta cyclotis</i>        | 0  | 34 | 34 | 0  | 0 | 0  | 0 | 0  | 0  | 0  | 32 | 0  | 0  | 0 | 0 | 0 | 0 | 0 | 0 | SF |
| <i>Castor canadensis</i>         | 0  | 15 | 0  | 0  | 0 | 0  | 0 | 15 | 0  | 5  | 65 | 0  | 0  | 0 | 0 | 0 | 0 | 0 | 0 | GH |
| <i>Castor fiber</i>              | 0  | 20 | 5  | 5  | 0 | 0  | 0 | 10 | 0  | 20 | 40 | 0  | 0  | 0 | 0 | 0 | 0 | 0 | 0 | GH |
| <i>Dolichotis patagonum</i>      | 70 | 15 | 4  | 3  | 0 | 0  | 0 | 0  | 8  | 0  | 0  | 0  | 0  | 0 | 0 | 0 | 0 | 0 | 0 | Gr |
| <i>Dolichotis salinicola</i>     | 8  | 38 | 8  | 0  | 0 | 30 | 0 | 0  | 8  | 0  | 8  | 0  | 0  | 0 | 0 | 0 | 0 | 0 | 0 | GH |
| <i>Hydrochoerus hydrochaeris</i> | 45 | 0  | 10 | 0  | 0 | 0  | 0 | 0  | 0  | 35 | 10 | 0  | 0  | 0 | 0 | 0 | 0 | 0 | 0 | MF |
| <i>Hydrochoerus isthmius</i>     | 45 | 0  | 10 | 0  | 0 | 0  | 0 | 0  | 0  | 35 | 10 | 0  | 0  | 0 | 0 | 0 | 0 | 0 | 0 | MF |
| <i>Cuniculus paca</i>            | 0  | 10 | 60 | 0  | 0 | 0  | 0 | 20 | 10 | 0  | 0  | 0  | 0  | 0 | 0 | 0 | 0 | 0 | 0 | Fr |
| <i>Cuniculus taczanowskii</i>    | 0  | 0  | 50 | 0  | 0 | 0  | 0 | 0  | 50 | 0  | 0  | 0  | 0  | 0 | 0 | 0 | 0 | 0 | 0 | Fr |
| <i>Dinomys branickii</i>         | 0  | 45 | 45 | 0  | 0 | 0  | 0 | 0  | 10 | 0  | 0  | 0  | 0  | 0 | 0 | 0 | 0 | 0 | 0 | SF |
| <i>Hystrix africaeaustralis</i>  | 0  | 0  | 15 | 0  | 0 | 0  | 0 | 60 | 0  | 0  | 15 | 0  | 5  | 0 | 5 | 0 | 0 | 0 | 0 | Om |
| <i>Hystrix brachyura</i>         | 0  | 0  | 15 | 0  | 0 | 0  | 0 | 60 | 0  | 0  | 15 | 0  | 5  | 0 | 5 | 0 | 0 | 0 | 0 | Om |
| <i>Hystrix crassispinis</i>      | 0  | 0  | 33 | 0  | 0 | 0  | 0 | 67 | 0  | 0  | 0  | 0  | 0  | 0 | 0 | 0 | 0 | 0 | 0 | Om |
| <i>Hystrix cristata</i>          | 0  | 0  | 15 | 0  | 0 | 10 | 0 | 50 | 0  | 0  | 10 | 0  | 5  | 0 | 5 | 5 | 0 | 0 | 0 | Om |
| <i>Hystrix indica</i>            | 0  | 0  | 20 | 0  | 0 | 0  | 0 | 40 | 20 | 0  | 20 | 0  | 0  | 0 | 0 | 0 | 0 | 0 | 0 | Om |
| <i>Hystrix javanica</i>          | 20 | 20 | 20 | 0  | 0 | 20 | 0 | 20 | 0  | 0  | 0  | 0  | 0  | 0 | 0 | 0 | 0 | 0 | 0 | GH |
| <i>Hystrix pumila</i>            | 0  | 0  | 28 | 0  | 0 | 0  | 0 | 57 | 0  | 0  | 0  | 0  | 5  | 0 | 5 | 5 | 0 | 0 | 0 | Om |
| <i>Hystrix sumatrae</i>          | 0  | 0  | 24 | 0  | 0 | 0  | 0 | 47 | 0  | 0  | 24 | 0  | 0  | 0 | 5 | 0 | 0 | 0 | 0 | Om |
| <i>Myocastor coypus</i>          | 0  | 10 | 0  | 0  | 0 | 0  | 0 | 10 | 0  | 70 | 10 | 0  | 0  | 0 | 0 | 0 | 0 | 0 | 0 | GH |
| <i>Marmota baibacina</i>         | 48 | 0  | 0  | 0  | 0 | 48 | 0 | 0  | 0  | 0  | 0  | 0  | 4  | 0 | 0 | 0 | 0 | 0 | 0 | MF |
| <i>Marmota bobak</i>             | 50 | 0  | 0  | 0  | 0 | 30 | 0 | 10 | 10 | 0  | 0  | 0  | 0  | 0 | 0 | 0 | 0 | 0 | 0 | MF |
| <i>Marmota broweri</i>           | 20 | 0  | 20 | 0  | 0 | 38 | 0 | 0  | 18 | 0  | 0  | 0  | 4  | 0 | 0 | 0 | 0 | 0 | 0 | GH |

|                               |    |    |    |    |   |    |   |    |    |    |    |   |     |   |   |   |   |   |   |    |
|-------------------------------|----|----|----|----|---|----|---|----|----|----|----|---|-----|---|---|---|---|---|---|----|
| <i>Marmota caligata</i>       | 25 | 25 | 0  | 25 | 0 | 0  | 0 | 0  | 0  | 25 | 0  | 0 | 0   | 0 | 0 | 0 | 0 | 0 | 0 | MF |
| <i>Marmota camtschatica</i>   | 14 | 10 | 14 | 0  | 0 | 10 | 0 | 20 | 20 | 0  | 8  | 0 | 4   | 0 | 0 | 0 | 0 | 0 | 0 | GH |
| <i>Marmota caudata</i>        | 33 | 33 | 0  | 0  | 0 | 34 | 0 | 0  | 0  | 0  | 0  | 0 | 0   | 0 | 0 | 0 | 0 | 0 | 0 | MF |
| <i>Marmota himalayana</i>     | 14 | 14 | 14 | 0  | 0 | 14 | 0 | 20 | 24 | 0  | 0  | 0 | 0   | 0 | 0 | 0 | 0 | 0 | 0 | GH |
| <i>Marmota marmota</i>        | 14 | 14 | 0  | 14 | 0 | 15 | 0 | 14 | 14 | 0  | 0  | 0 | 15  | 0 | 0 | 0 | 0 | 0 | 0 | GH |
| <i>Marmota menzbieri</i>      | 14 | 14 | 14 | 0  | 0 | 14 | 0 | 20 | 24 | 0  | 0  | 0 | 0   | 0 | 0 | 0 | 0 | 0 | 0 | GH |
| <i>Marmota monax</i>          | 42 | 7  | 10 | 0  | 0 | 0  | 0 | 0  | 14 | 0  | 10 | 0 | 10  | 0 | 0 | 7 | 0 | 0 | 0 | MF |
| <i>Marmota sibirica</i>       | 80 | 0  | 0  | 0  | 0 | 20 | 0 | 0  | 0  | 0  | 0  | 0 | 0   | 0 | 0 | 0 | 0 | 0 | 0 | Gr |
| <i>Marmota vancouverensis</i> | 30 | 5  | 15 | 20 | 0 | 30 | 0 | 0  | 0  | 0  | 0  | 0 | 0   | 0 | 0 | 0 | 0 | 0 | 0 | GH |
| <i>Orycteropus afer</i>       | 0  | 0  | 0  | 0  | 0 | 0  | 0 | 0  | 0  | 0  | 0  | 0 | 100 | 0 | 0 | 0 | 0 | 0 | 0 | IF |
